## Co-occupancy analysis reveals novel transcriptional synergies for axon growth

Ishwariya Venkatesh<sup>1\*</sup>, Vatsal Mehra<sup>1</sup>, Zimei Wang<sup>1</sup>, Matthew T. Simpson<sup>1</sup>, Erik Eastwood<sup>1</sup>, Advaita Chakraborty<sup>1</sup>, Zac Beine<sup>1</sup>, Derek Gross<sup>1</sup>, Michael Cabahug<sup>1</sup>, Greta Olson<sup>1</sup> and Murray G. Blackmore<sup>1\*</sup>.

\* These two authors contributed equally.

Author affiliations: 1 - Department of Biomedical Sciences, Marquette University, Milwaukee, WI.

Corresponding Authors - Ishwariya Venkatesh and Murray.G.Blackmore.

Department of Biomedical Sciences, Marquette University, Milwaukee, WI, 53201, USA. Phone: Email Address: [ishwariya.venkatesh@marquette.edu](mailto:ishwariya.venkatesh@marquette.edu); [murray.blackmore@marquette.edu](mailto:murray.blackmore@marquette.edu)

Conflict of Interest: None

**Acknowledgments**: This work was supported by grants from NINDS (5R01NS083983, R21NS106309), The Craig Neilsen Foundation, The Bryon Riesch Paralysis Foundation, and computational allocations from NSF-XSEDE. We wish to thank Erik Van Newenhizen for technical assistance. The authors acknowledge ENCODE consortia for generating the developmental time-series NGS datasets used in this study. The authors acknowledge the use of Biorender to generate illustrations and graphics used in the manuscript. The authors declare no competing financial interests.

45

46 **Abstract:**

47 Transcription factors (TFs) act as powerful levers to regulate neural physiology and can be targeted to  
48 improve cellular responses to injury or disease. Because TFs often depend on cooperative activity, a major  
49 challenge is to identify and deploy optimal sets. Here we developed a novel bioinformatics pipeline,  
50 centered on TF co-occupancy of regulatory DNA, and used it to predict factors that potentiate the effects  
51 of pro-regenerative Klf6. High content screens of neurite outgrowth identified cooperative activity by 12  
52 candidates, and systematic testing in an animal model of corticospinal tract (CST) damage substantiated  
53 three novel instances of pairwise cooperation. Combined Klf6 and Nr5a2 drove the strongest growth, and  
54 transcriptional profiling of CST neurons identified Klf6/Nr5a2-responsive gene networks involved in  
55 macromolecule biosynthesis and DNA repair. These data identify novel TF combinations that promote  
56 enhanced CST growth, clarify the transcriptional correlates, and provide a bioinformatics roadmap to  
57 detect TF synergy.

58

59 **Introduction:**

60 As they mature, neurons in the central nervous system (CNS) decline in their capacity for robust  
61 axon growth, which broadly limits recovery from injury<sup>1-5</sup>. Axon growth depends on the transcription of  
62 large networks of regeneration-associated genes (RAGs), and coaxing activation of these networks in adult  
63 CNS neurons is a major unmet goal<sup>2,4</sup>. During periods of developmental axon growth, RAG expression is  
64 supported by pro-growth transcription factors (TFs) that bind to relevant promoter and enhancer regions to  
65 activate transcription<sup>3,6</sup>. One factor that limits RAG expression in mature neurons is the developmental  
66 downregulation of these pro-growth TFs<sup>2,4</sup>. Thus, identifying TFs that act developmentally to enable axon  
67 growth and supplying them to mature neurons is a promising approach to improve regenerative outcomes  
68 in the injured nervous system.

69 An ongoing challenge, however, is to decode the optimal set of factors for axon growth. To date,  
70 progress has centered on identifying individual TFs whose ectopic expression in mature neurons leads to  
71 improved axon growth. For example, we showed previously that the TF Klf6 is developmentally  
72 downregulated and that viral re-expression drives improved axon growth in mature corticospinal neurons,  
73 which are critical mediators of fine movement<sup>7</sup>. The restoration of axon growth from this and other single-  
74 factor studies remains partial, however, indicating the need for additional intervention.<sup>7-12</sup>. One likely  
75 possibility is that because multiple TFs generally act in a coordinated manner to regulate transcription, a  
76 more complete restoration of axon growth will depend on multiple TFs. Consistent with this, regeneration  
77 competent neurons recruit groups of interacting TFs in the hours to days post-injury, which results in

78 transcriptional remodeling leading to reactivation of growth gene networks and functional recovery<sup>13-15</sup>.  
79 The need for multi-TF interventions in CNS neurons is recognized conceptually<sup>4,16</sup>, but a major challenge  
80 has been to develop a systematic pipeline aimed at discovering growth-relevant TF combinations.

81 Here we developed a novel bioinformatics framework to detect cooperative TF promotion of axon  
82 growth. The framework centers on the concept of TF co-occupancy, in which functional interactions  
83 between TFs are detected by virtue of shared binding to common sets of regulatory DNA. We deployed  
84 the pipeline to predict novel TFs that potentially synergize with Klf6 to drive enhanced axon outgrowth. *In*  
85 *vitro* phenotypic screening confirmed cooperative TF activity for 12 candidates, and two independent  
86 bioinformatic analyses converged to prioritize interest in a core of three factors, Nr5a2, Rarb, and Eomes.  
87 Systematic tests of forced TF co-expression *in vivo* using a pyramidotomy model of axon injury revealed  
88 strong and consistent promotion of corticospinal tract axon growth by combined expression of Klf6 and  
89 Nr5a2. Finally, transcriptional profiling of purified corticospinal tract (CST) neurons revealed  
90 transcriptional correlates to the evoked growth, notably genes modules related to biosynthesis and DNA  
91 repair. Overall, we have identified novel combinations of transcription factors that drive enhanced axon  
92 growth in mature CNS neurons, and provide a generalized computational roadmap for the discovery of  
93 cooperative activity between TFs with potential application to a wide range of neural activities.

## 94 **Results:**

### 95 *In vitro* screening identifies TFs that synergize with Klf6 to drive increased neurite outgrowth:

96  
97 Transcription factors (TFs) that functionally synergize often do so by binding DNA in close  
98 proximity and initiating complementary transcriptional mechanisms<sup>17-20</sup>. Thus, analysis of TF co-  
99 occupancy can reveal novel instances of cooperation between TFs<sup>21,22</sup>. It was shown previously that the TF  
100 Klf6 is expressed in CST neurons during developmental periods of axon growth, is down-regulated during  
101 postnatal maturation, and that forced re-expression in adult neurons modestly enhances axon growth<sup>7</sup>. We  
102 therefore reasoned that during development, additional TFs likely co-occupy regulatory elements  
103 alongside Klf6 and cooperate to regulate transcription. We further hypothesized that identifying these co-  
104 occupiers and supplying them to adult neurons along with Klf6 may lead to further enhancement of axon  
105 growth after injury.  
106  
107

108 To identify potential Klf6 co-occupiers, we first assembled a list of genes that decline in expression  
109 as cortical neurons mature, using data from corticospinal motor neurons (CSMN) *in vivo* and cortical  
110 neurons ages *in vitro*<sup>23,24</sup> (**Fig.1a**). Genes common to both datasets were selected for further analysis. To

111 tighten the focus on genes that contribute to axon growth, we selected those genes associated with Gene  
112 Ontology terms linked to axon growth, including cytoskeleton organization, microtubule-based transport,  
113 nervous system development, and regulation of growth (**Fig.1b**). **Supplementary Table 1** summarizes the  
114 final list of 308 developmentally downregulated pro-growth genes and their associated GO terms. For each  
115 gene, promoters were assigned as 1500 bp upstream/300 bp downstream of the transcription start site  
116 (TSS). To assign enhancers we took advantage of recent advances in machine learning-based algorithms,  
117 deploying the activity-by-contact (ABC) pipeline to reconstruct functional enhancer-gene pairs during  
118 active periods of developmental axon growth<sup>25</sup>. Utilizing open-access ENCODE datasets of chromatin  
119 accessibility, H3K27Ac enrichment, HiC, and expression datasets from embryonic forebrain, ABC  
120 identified a total of 1230 enhancers linked to the selected growth-relevant genes<sup>26</sup> (**Fig.1c**). Each gene was  
121 associated with between 1 and 13 enhancers (Mean 6 +/- 3 SEM), 80% of which were located 10-1500 kb  
122 from the transcription start site. The full list of enhancer-gene pairs with genomic coordinates is  
123 summarized in **Supplementary Table 1**. Finally, to predict the binding of Klf6 and potential co-occupying  
124 TFs, we examined promoters and enhancers using an anchored TF motif analysis algorithm. This  
125 algorithm scans sequences for the canonical Klf6 binding motif and then identifies TF binding motifs that  
126 are over-represented in nearby DNA<sup>27</sup>. The result was 62 candidate TFs that were predicted to frequently  
127 co-occur with Klf6 in pro-growth promoters, pro-growth enhancers, or both (**Fig.1d**).

128 We next used high content screening to test the prediction that these candidate TFs functionally  
129 synergize with Klf6 to enhance neurite outgrowth (**Fig.2a**). Using a well-established screening platform,  
130 postnatal cortical neurons received candidate genes by plasmid electroporation and were cultured at low  
131 density on laminin substrates, followed two days later by automated tracing to quantify neurite  
132 outgrowth.<sup>7,12,24,28-31</sup> Nuclear-localized EGFP served to mark transfected neurons, and  $\beta$ III tubulin  
133 immunohistochemistry labeled neuronal processes for automated tracing (**Fig.2b**). All screening plates  
134 included wells with three standard treatments: 1) EBFP plasmid alone, 2) Klf6 mixed with mCherry  
135 control and 3) Klf6 mixed with VP16-Stat3, a combination that was shown previously to elevate neurite  
136 length above Klf6 alone<sup>7</sup>. This design accounts for inter-plate variability by normalizing all lengths to  
137 EBFP, while establishing on each plate both the Klf6-only effect size and the sensitivity to potential  
138 increase above that level. As expected, across the screen forced expression of Klf6 alone increased neurite  
139 outgrowth by 28% (+/- 4.37% SEM) compared to EBFP control while combination with VP16-Stat3  
140 further elevated lengths to 61% (+/- 5.59%) of EBFP (p-value<.01, ANOVA with post-hoc Fisher's LSD).  
141 The remainder of each plate was devoted to Klf6 mixed with candidate TFs, which were delivered in their  
142 native form, not modified with VP16, in order to probe endogenous activity. Each combination was tested  
143 in three separate experiments and a minimum of 150 individual cells quantified per experiment. Notably,

144 of the 62 candidate TFs, twelve significantly elevated neurite length above the level of Klf6 alone (“hard  
145 hits”) (p-value <0.05, ANOVA with post-hoc Fisher's LSD), and an additional five missed statistical  
146 significance but improved growth in two of three replicate experiments (“soft hits”) (**Fig.2a**). Detailed  
147 screening data are available in **Supplementary Table 2**, and **Supplemental Figure 1** provides data for the  
148 effects of TFs on additional morphological parameters. Interestingly, all twelve TFs that elevated neurite  
149 length came from the one-third of candidates that were predicted to co-occupy with Klf6 in both promoters  
150 and enhancers, and no hits came from TFs predicted to co-occupy solely in promoters or in enhancers  
151 (**Fig.2c**). These data support the ability of co-occupancy analysis to predict functional interactions between  
152 TFs and emphasize the importance of scanning both promoter and enhancer elements.

153 We then used network analyses to prioritize interest in the twelve “hard hit” TFs. First, using open-  
154 access TF binding data, top transcriptional targets of the twelve hit TFs were used to generate individual  
155 TF-target gene networks. These networks were then merged, expanded to bring in immediately connected  
156 genes based on known interactions, and restructured to move genes with maximal connections to the  
157 center and minimal connections to the periphery. This resulted in a unified network with a core of TFs  
158 predicted to exert maximal influence, surrounded by shells of TFs with progressively lower connectivity  
159 (**Fig. 2c**). Notably, during the expansion step, Klf6 itself was among the genes that were spontaneously  
160 added to the network. Klf6 was the only added TF to be placed in the core, even as additional pro-growth  
161 TFs including Sox11, Stat3, Myc, and Jun appeared in inner shells. The appearance of these TFs and their  
162 central positions in the network substantiates the premise that the constructed network is Klf6-centered  
163 and relevant to axon growth<sup>2,7-11,32-34</sup>. Moreover, all five of the “soft hit” TFs also appeared but were  
164 placed in outer shells of the network, hinting at interactions near the threshold of screening sensitivity.  
165 Most importantly, three hit TFs (Nr5a2, Eomes, Rarb) occupied the core with Klf6, prioritizing subsequent  
166 interest. Thus, an integrated pipeline of co-occupancy analyses, high content screening, and network  
167 analyses point toward three TFs as potentially cooperative with Klf6.

168  
169 For independent validation, we performed a second analysis, this time starting from a previously  
170 published set of genes that are upregulated in cortical neurons *in vitro* upon forced expression of Klf6<sup>7</sup>.  
171 We again performed a network analysis of Klf6-upregulated genes, constructing functionally related  
172 subnetworks, and then examined gene promoters within each subnetwork for the enrichment of TF motifs.  
173 This independent analysis detected enrichment for the motifs of seven factors, which remarkably included  
174 the 3 “core” TFs identified above (**Fig.2d**). Thus, genes that respond to Klf6 over-expression are enriched  
175 for the recognition motifs of Eomes, Nr5a2, and Rarb, supporting the hypothesis that they cooperate with  
176 Klf6 to activate pro-growth gene networks.

177  
178 *Nr5a2 synergizes with Klf6 and Rarb to drive enhanced CST sprouting following pyramidotomy injury:*

179 We next asked whether forced expression of the three hit TFs, singly or in conjunction with Klf6,  
180 can promote the growth of CST axons *in vivo*. Based on serotype availability we first verified the ability of  
181 AAV2-Retro vectors, previously shown effectively transduce CST neurons in a retrograde fashion<sup>35</sup>, to  
182 also transduce neurons when applied directly to cell bodies. We delivered a titer-matched mixture of  
183 AAV-H2B-mEGFP and AAV-H2B-mScarlet to the cortex of adult mice, followed by retrograde labeling  
184 of CST neurons by cervical injection of CTB-647. Two weeks later, 3.6% (+/- 1.5%) of transfected CST  
185 neurons expressed only EGFP, 1.0% (+/- 0.3%) expressed only mScarlet, and 95.4% (+/- 1.5%) expressed  
186 both fluorophores (**Supplementary Fig. 2**). Accordingly, TFs were delivered to adult mice by cortical  
187 injection of Retro-AAV (hereafter shortened to AAV), with AAV-Cre acting as control and also included  
188 in single-gene treatments to equalize the viral load in all animals (**See Supplementary Table 3**). tdTomato  
189 tracer was co-injected in serotype AAV9, avoiding potential complications of retrograde spread of the  
190 tracer itself. Mice received unilateral pyramidotomy, followed eight weeks later by quantification of cross-  
191 midline sprouting of corticospinal (CST) axons in the cervical spinal cord, measured at 200, 400, and  
192 600  $\mu$ m from the midline (**Fig.3a,d**). Axon counts were normalized to tdTomato+ axons in the medullary  
193 pyramids (**Fig. 3b**) and injuries were confirmed by unilateral ablation of PKC $\alpha$  in spinal sections (**Fig.**  
194 **3c**). Raw images of all animals are provided in **Supplementary Figs. 3-5**. In addition to Cre, we also  
195 included Nkx3.2, a non-hit/non-core TF, as an additional negative control; RNAscope or  
196 immunohistochemistry confirmed overexpression of all TFs (**Supplementary Fig. 6a-e**). As expected,  
197 Klf6 expression significantly increased normalized axon counts at all distances across the midline ( $p < .01$ ,  
198 2-way ANOVA) (**Fig.3 e,g**). When expressed singly, none of the candidate TFs significantly elevated axon  
199 growth above the level of control (**Fig.3 e, h,j,l, n**). When combined with Klf6, however, significant  
200 effects emerged (**Fig.3 e-o**). Most notably, co-expression of Nr5a2 with Klf6 consistently elevated axon  
201 counts above that of Klf6 alone, and above the maximum growth in Cre controls in all animals. Co-  
202 expression of Rarb with Klf6 drove growth that exceeded Klf6 alone at 200  $\mu$ m from the midline (**Fig.**  
203 **3e**). In three of nine animals, combined Eomes/Klf6 expression yielded high axon counts, but this effect  
204 was inconsistent and did not reach statistical significance (**Fig. 3e**). Finally, as, expected, Nkx3.2 produced  
205 no significant elevation in axon growth above the level of Klf6 alone (**Fig.3 e, i**). In summary, these data  
206 identify robust synergy between Klf6 and candidate TFs, most notably Nr5a2.

207  
208 We then performed a second *in vivo* pyramidotomy experiment to confirm Nr5a2's synergy with  
209 Klf6, and to determine whether Nr5a2 might similarly potentiate the growth of other pro-growth TFs.



210 AAV delivery, injury, and axon quantification were identical to the first experiment, and detailed histology  
211 is available in **Supplementary Figs. 3-5**. In this experiment, Nr5a2 acted as the base gene, to which  
212 control, Klf6, or Rarb were added. Consistent with the prior experiment, combined Nr5a2/Klf6 expression  
213 elevated CST growth above the level of either alone (**Fig.4e**). Moreover, axon growth in the lowest  
214 Klf6/Nr5a2 animal still exceeded that in the maximum control animal, illustrating the strength and  
215 consistency of the effect. Interestingly, combined Nr5a2 and Rarb also elevated CST growth above the  
216 level of either alone (**Fig.4a-e**). This effect did not appear as striking as that of Nr5a2/Klf6, but  
217 nevertheless substantiates the ability of network analysis to predict functional TF co-operation. Thus,  
218 combinations of TFs, rationally selected based on the basis of predicted co-occupancy of pro-growth  
219 regulatory DNA, can enhance CST axon growth *in vivo*.

220 Next, focusing on the Klf6 and Nr5a2 combination, we performed additional experiments to  
221 substantiate and clarify the phenotypic effects *in vivo*. First, to further confirm successful co-expression we  
222 performed additional cortical injections, using the same viral loads as the pyramidotomy experiments,  
223 followed by RNAscope-based co-detection of Klf6 and Nr5a2. In animals that received AAV-tdTomato  
224 with AAV-Klf6 and AAV-Nr5a2, more than 90% of tdTomato-positive cells showed strong label with  
225 both transgenes (**Supplementary Fig. 6**). Thus tdTomato-labeled axons in the spinal cord in Nr5a2/Klf6  
226 animals largely arose from CST neurons expressing both TFs. We next compared inflammation, gliosis,  
227 and cell death in the cortex of animals that received control versus Klf6/Nr5a2. Three days after injection,  
228 CD11b, GFAP, and TUNEL reactivity near the needle tracks were similar across treatments  
229 (**Supplementary Fig. 7a-d,i,j**). We also examined cortices in which CST neurons were identified by  
230 retrograde labeling, and again detected similarly low levels of GFAP, CD11B, and TUNEL reactivity  
231 (**Supplementary Fig. 7e-h, i, j**). These data support a model in which Klf6/Nr5a2 act directly in CST  
232 neurons to influence axon growth, as opposed to acting indirectly by influencing gliosis, inflammation, or  
233 cell death.

234 We next re-examined the morphology of Klf6/Nr5a2-evoked growth by quantifying the frequency  
235 of branch points in CST axons. Starting with tissue sections from the second pyramidotomy experiment,  
236 axons that sprouted across the cervical midline were visualized at high magnification by confocal  
237 microscopy (**Fig.5a-d**). Segments of axons that remained continuously within the plane of visualization for  
238 a minimum of 100 $\mu$ m were identified and traced, and the number of definitive branches along the segment  
239 was normalized to the traced length. Interestingly, CST axons in Klf6/Nr5a2-treated animals displayed  
240 significant elevation of the frequency of branch formation (**Fig. 5e,f, g** control: 2.5 +/- 0.4 SEM  
241 branches/mm, Klf6/Nr5a2: 9.6 +/- 0.5 SEM branches/mm). This finding is consistent with the *in vitro*  
242 screening data, which showed that Klf6/Nr5a2 expression increased the length of the longest neurite when

243 branches were included in the tracing, but not when only the longest unbranched path was analyzed  
244 (**Supplementary Fig. d,e**). Combined, these data indicate that combined Klf6/Nr5a2 expression in cortical  
245 neurons can act to increase branch formation and growth.

246 Finally, we tested the effects of forced expression of Klf6/Nr5a2 in a model of direct axon injury.  
247 Adult mice received cortical injections of AAV-EGFP tracer and either AAV-Cre control or combined  
248 AAV-Klf6 and AAV-Nr5a2. Animals received a severe crush injury to thoracic spinal cord, followed four  
249 weeks later by perfusion and visualization of axons in horizontal spinal sections (**Fig. 6a-d**). GFAP  
250 reactivity defined the injury site, which as expected spanned the entirety of the cord in all animals. In  
251 control and Klf6/Nr5a2-treated animals alike, CST axons were completely interrupted by the injury and in  
252 no animals did we observe extension of axons from the severed ends into or beyond the injury site. The  
253 distance between the lesion edge and CST axons was similar between groups, suggesting similar retraction  
254 behavior. Notably, however, axons treated with Klf6/Nr5a2 displayed a strong sprouting response into  
255 spinal tissue rostral to the injury, including robust extension across the spinal midline. Individual axons  
256 were clearly visualized crossing the midline, and Klf6/Nr5a2 animals showed a significant elevation of  
257 axon density in contralateral spinal cord, normalized to axon counts in the medulla (**Fiber Index, Fig. 6e**).  
258 Thus, although Klf6/Nr5a2 does not confer to CST axons an ability to traverse the strongly inhibitory  
259 environment of a spinal lesion, it does act in injured axons to increase the propensity for growth by axon  
260 collaterals.

261  
262 *Combined Klf6-Nr5a2 treatment leads to the upregulation of gene modules related to macromolecule*  
263 *biosynthesis and DNA repair:*

264 To probe the underlying mechanisms of growth promotion, we profiled the transcriptional  
265 consequences of single and combined expression of Klf6 and Nr5a2 in CST neurons. To isolate CST  
266 neurons, nuclear-localized fluorophores and TFs were expressed by cervical injection of Retro-AAV2,  
267 which results in highly efficient and selective transgene expression by retrograde transduction<sup>35</sup> (**Fig.7a-**  
268 **b**). Animals received pyramidotomy injury, followed one week later by purification of labeled nuclei of  
269 CST neurons from the spared hemisphere by flow cytometry, isolation of messenger RNA, and  
270 construction and sequencing of RNA libraries. Differential gene expression was determined using EdgeR  
271 software<sup>36</sup>. Compared to tdTomato control, single expression of Klf6 resulted in the upregulation of 208  
272 transcripts (transcripts with FPKM>5 and log2fold change>1; p-value < 0.05, FDR < 0.05) (**Fig.7c**).  
273 Reminiscent of prior findings in cultured neurons<sup>7</sup>, network analysis of Klf6-responsive genes revealed  
274 subnetworks with functions highly relevant to axon growth, including CNS development, neuron  
275 projection development, migration, adhesion, and cytoskeleton organization (**Fig.7d-f**). Indeed, neuron



276 projection and cytoskeleton networks comprised more than 60% of Klf6-responsive genes, consistent with  
277 the effects of Klf6 overexpression on axon growth (**Fig.7d-f**). Single overexpression of Nr5a2 had little  
278 unique effects on gene expression, with only 12 transcripts identified as upregulated only in the Nr5a2  
279 group, and 130 transcripts shared with the Klf6 treatment group (**Fig.7c**). Dual Klf6/Nr5a2 expression,  
280 however, drove upregulation of 192 transcripts that were not significantly increased by either alone  
281 (**Supplementary Table 4, Fig.7c**). Interestingly, network analysis of these transcripts revealed modules  
282 involved in macromolecule biosynthesis, DNA repair, and development, all of which showed substantial  
283 increases in the net expression above control levels (**Fig.7g-i**).

284 To further validate the findings of this bulk RNA-Seq approach we performed a replicate study,  
285 this time employing a single-nuclei RNA-Seq approach. Nuclear-localized fluorophores and TFs (Control  
286 or Klf6+Nr5a2) were expressed by cervical injection of Retro-AAV2 as described above (**Supplementary**  
287 **Fig.8a**) Animals received pyramidotomy injury, followed one week later by purification of labeled nuclei  
288 of CST neurons by flow cytometry, construction and sequencing of single-nuclei libraries. Using this  
289 approach, we sequenced and analyzed ~3000 control nuclei and Klf6/Nr5a2 treated nuclei  
290 (**Supplementary Fig.8b**). The majority of nuclei partitioned into clusters highly enriched for established  
291 markers of CST neurons, including Bcl11b, Cdh13, Tmem163, Crim1, Cntn6 and Slco2a1, indicating  
292 successful purification of CST neurons<sup>23,37,38</sup> (**Supplementary Fig.8c**). We integrated control and  
293 Klf6/Nr5a2 single-nuclei datasets using SEURAT<sup>39</sup> and carried out differential gene expression analyses  
294 to identify Klf6/Nr5a2 responsive target genes, specifically in the high-confidence CST cluster  
295 (**Supplementary Table 4**). As expected, Klf6 and Nr5a2 themselves were detected as strongly  
296 upregulated. In addition, when comparing the output of the initial bulk RNA-Seq and single-nuclei RNA-  
297 Seq, 144 genes were commonly called as significantly regulated by Klf6/Nr5a2 in both the datasets, 101 of  
298 which were shared with the 192 transcripts called as Klf6/Nr5a2-specific in the bulk RNA-Seq experiment  
299 (>50% overlap) (**Supplementary Fig 8d**). Importantly, all shared target genes were located in clusters  
300 functionally linked to roles in Macromolecule Biosynthesis, DNA repair and CNS development, providing  
301 independent support for regulation of these processes by combined expression of Klf6 and Nr5a2  
302 (**Supplementary Fig. 8e-g**). Intriguingly, recent analyses of regeneration-competent peripheral neurons  
303 also showed that genes involved in macromolecule biosynthesis and DNA repair are upregulated in the  
304 course of successful regeneration<sup>14</sup>, supporting their potential involvement in axon growth. In aggregate,  
305 these data substantiate the ability of forced Klf6 expression to activate gene networks relevant to axon  
306 growth and point toward the ability of dual Klf6/Nr5a2 expression to activate gene networks involved in  
307 macromolecule synthesis and DNA repair as a likely explanation for their combined enhancement of axon  
308 growth.

309

## 310 **Discussion**

311 Using interlocking bioinformatics approaches, high content screening, and *in vivo* testing, we have  
312 identified new transcription factor (TF) combinations that synergize to enhance CST axon growth. In  
313 addition, transcriptional profiling and network analyses provide molecular correlates to the evoked  
314 responses. These findings clarify cellular functions that drive axon extension and serve as a roadmap for  
315 ongoing efforts to discover novel combinatorial gene treatments to promote regenerative axon growth.

316

317 Klf6 belongs to the KLF family of transcription factors, which have well-studied roles in regulating  
318 axon growth<sup>7,12,28,40</sup>. Retinoic acid receptor Beta (Rarb) and Nuclear Receptor Subfamily 5, Group A,  
319 Member 2 (Nr5a2/LRH-1) both belong to the nuclear receptor family of transcription factors, with diverse  
320 functions in development and cellular metabolism<sup>41</sup>. Rarb has previously been linked to axon growth, and  
321 a Rarb agonist is under evaluation for clinical efficacy in a brachial plexus avulsion model of injury<sup>42</sup>. In  
322 contrast, Nr5a2 is unstudied in the context of axon extension. It has, however, been linked to the  
323 differentiation of neural stem cells and to cellular reprogramming, and can replace Oct4 in the  
324 reprogramming of murine somatic cells to pluripotent cells<sup>43,44</sup>. Our present work adds to the growing  
325 body of evidence that TFs involved in neuronal differentiation may positively influence axon growth<sup>9,13</sup>.

326

327 An important finding is that although Nr5a2 does not improve axon growth when expressed  
328 individually, it strongly potentiates the effect of overexpressed Klf6. The importance of combinatorial  
329 gene activity for axon growth, as opposed to single factor effects, is increasingly recognized<sup>2,4,45</sup>.  
330 Regeneration-competent cell types such as zebrafish retinal ganglion cells and peripherally injured sensory  
331 neurons respond to axotomy by upregulating groups of TFs that likely synergize to drive regenerative axon  
332 growth<sup>14,15,46</sup>. An unmet challenge, however, has been to turn the conceptual appreciation for the role of  
333 TF synergy into an operational workflow to discover effective gene combinations for axon extension in the  
334 injured nervous system. Whereas prior efforts have focused on direct protein-protein interactions to predict  
335 TF synergy<sup>46</sup>, here we exploited the concept of TF co-occupancy. A search for factors with recognition  
336 motifs in proximity to those of Klf6 yielded a set of 62 candidate TFs, which was further narrowed by  
337 phenotypic screening. A key observation from the cell culture experiments is that none of the hit TFs were  
338 predicted to co-occupy solely in promoter regions; rather, all hit TFs were characterized by predicted co-  
339 occupancy in both promoters and enhancers. This suggests a key role for enhancer elements in regulating  
340 pro-growth gene transcription, in line with the recent finding in DRG neurons that modulation of  
341 enhancers may be critical for transcriptional activation of growth genes<sup>13,47</sup>.

342 Finally, guided by network analysis of the screening results, a systematic campaign of  
343 combinatorial testing *in vivo* identified highly consistent enhancement of CST axon growth by combined  
344 expression of Klf6 and Nr5a2. Importantly, in a model of pyramidotomy injury delivery of Klf6 and Nr5a2  
345 did not affect cell survival, but did affect both the overall density and frequency of branching of collateral  
346 axons in contralateral spinal cord. Moreover, in axotomized CST axons, forced expression also increased  
347 the growth of collateral branches, although not regenerative growth across a spinal lesion. Importantly, in  
348 contrast to prior reports of CST regeneration through crush sites, injuries here were performed using  
349 double crushes with wider forceps, thus producing complete lesions without astrocytic bridges<sup>48,49</sup>. The  
350 absence of regenerative advance in this model indicates that treated axons remained sensitive to  
351 environmental inhibition at the lesion, but do not rule out the possibility that Klf6 and Nr5a2 treatment  
352 could produce regenerative growth into more favorable environments, for example progenitor-derived  
353 tissue grafts<sup>50</sup>. In addition, the strong effects of combined Klf6 and Nr5a2 on collateral growth in both  
354 spared and injured CST axons suggests that this treatment could be highly beneficial in situations of partial  
355 injury by enhancing increased branch elaboration by spared axons and potentially fostering relay circuitry  
356 by injured axons<sup>51,52</sup>. A critical question for future research is whether the stimulated branches succeed in  
357 forming functional synapses on target cells in the spinal cord. To our knowledge, this is the first evidence  
358 of TF synergy in driving growth of axons following CNS injury *in vivo*. Although these experiments were  
359 anchored on Klf6, these data show a pipeline that can be re-deployed to identify additional TF  
360 combinations that synergize to drive growth, or potentially other cellular functions. To our knowledge, this  
361 is the first evidence of TF synergy in driving growth of axons following CNS injury *in vivo*. Although  
362 these experiments were anchored on Klf6, these data show a pipeline that can be re-deployed to identify  
363 additional TF combinations that synergize to drive growth, or potentially other cellular functions.

364  
365 A key insight from the current work is to clarify *in vivo*, in purified CST neurons, the  
366 transcriptional events that are triggered by Klf6, Nr5a2, and the two together. Forced expression of Klf6  
367 activates highly interconnected groups of genes with functions in various aspects of axon growth spanning  
368 terms such as Neuron Projection Development, Cytoskeleton organization, Motility, and Adhesion. We  
369 have previously shown that gene modules involved in Cytoskeleton remodeling and motility are evoked in  
370 response to Klf6 overexpression in cortical neurons *in vitro*<sup>7</sup>, consistent with our *in vivo* findings here.  
371 This overlap underscores the utility of *in vitro* screening approaches in delineating transcriptional  
372 networks relevant to axon growth. Importantly, this finding illustrates the potential of TF-based  
373 interventions to trigger broad changes in gene expression; it is most likely that improvements in axon  
374 growth reflect the net change in a wide set of transcripts, as opposed to acting through any single target.

375 Combined Klf6/Nr5a2 expression, which led to large and consistent increases in axon growth above those  
376 triggered by Klf6 alone, also caused the upregulation of unique modules of genes with functions in  
377 macromolecule biosynthesis and DNA repair. These modules were activated by neither Klf6 nor Nr5a2  
378 alone, suggesting that enhanced biosynthesis and/or DNA repair contribute to the enhanced growth in  
379 Klf6/Nr5a2-treated animals. A role for the biosynthesis of macromolecules is highly plausible, as active  
380 growth depends on new cellular material. Indeed, regeneration-competent zebrafish RGCs and  
381 mammalian DRGs also respond to injury by upregulating genes involved in macromolecule  
382 biosynthesis<sup>15,13,14</sup>. Moreover, a very recent study in DRG neurons found that peripheral injury, which  
383 triggers axon growth, resulted in a sustained upregulation of genes involved in biosynthesis. In contrast, a  
384 central injury that does not trigger regeneration led to eventual downregulation, suggesting that a reduction  
385 in biosynthesis pathways may restrict axon growth after spinal injury<sup>53</sup>. Our new findings regarding the  
386 effects of Klf6/Nr5a2 add to multiple lines of evidence that the upregulation of genes involved in  
387 biosynthesis may be an evolutionarily conserved molecular signature of neurons mounting a successful  
388 growth response.

389  
390 Regarding DNA repair pathways, it is interesting to note that increased cellular metabolism and  
391 transcription frequently lead to DNA damage<sup>54,55</sup>. Moreover, disruption of DNA repair machinery in  
392 mouse retinal progenitors or cortical progenitors leads to reduced, disturbed trajectories of axon growth  
393 and guidance<sup>56,57</sup>. Thus during development, proper axon growth may require efficient DNA repair  
394 machinery. Similarly, peripherally injured DRG neurons upregulate several DNA damage response marker  
395 genes, and blocking this response leads to reduced neurite outgrowth *in vitro* and impaired regeneration *in*  
396 *vivo*<sup>58</sup>. The finding that combined Klf6/Nr5a2 expression activates genes involved in DNA repair suggests  
397 the intriguing hypothesis that this repair machinery may aid successful axon regrowth in CNS neurons;  
398 future work can address this notion.

399 In summary, a new bioinformatic and screening platform, centered on the concept of TF co-  
400 occupancy, has revealed synergy between transcription factors Klf6 and Nr5a2 that leads to improved  
401 axon growth after CNS injury.

#### 402 Methods:

##### 403 Identification of developmentally downregulated, growth-relevant transcripts:

404  
405 All expression datasets used to identify developmentally down-regulated genes are deposited at NCBI  
406 GEO ( In vivo CSMNs data by<sup>23</sup> - GSE2039; In vitro primary neurons aged in culture by<sup>24</sup>, SRP151916).  
407 *In vitro* RNA-Seq datasets were processed as described previously<sup>24</sup>. Trimmed reads were mapped to the

408 rat reference genome [UCSC, Rat genome assembly: Rnor\_6.0] using HISAT2 aligner software (unspliced  
409 mode along with `-qc` filter argument to remove low quality reads prior to transcript assembly)<sup>59</sup>. Transcript  
410 assembly was performed using Stringtie<sup>60</sup> and assessed through visualization on UCSC Genome Browser.  
411 Differential gene expression analysis was performed using Ballgown software (Default parameters)<sup>60</sup>.  
412 Transcripts were considered significant if they met the statistical requirement of having a corrected p-value  
413 of  $<0.05$ , FDR  $<0.05$ .

414 For the *in vivo* CSMN microarray datasets, weighted correlation network analysis (WGCNA) was  
415 performed as described previously<sup>61</sup>. First, relevant microarray datasets (GSE2039) were loaded into R  
416 and basic pre-processing of data was performed to remove outlier data and handle probes with missed  
417 data. Outlier data was identified by performing hierarchical clustering to detect array outliers. Numbers of  
418 missing samples in each probe profile were counted and probes with extensive numbers of missing  
419 samples were removed. All pre-processing steps were performed as described in<sup>61</sup>. Next, a weighted  
420 correlation network was constructed by creating a pairwise pearson correlation matrix, which was  
421 transformed into an adjacency matrix using a power of 10. Then, topological overlap was calculated to  
422 measure network interconnectedness and average linkage hierarchical clustering was done to group genes  
423 on the basis of the topological overlap dissimilarity measure. Finally, using a dynamic tree-cutting  
424 algorithm we identified 20 gene modules. Gene modules with developmental down-regulation in  
425 expression of 2-fold and above were isolated for ontology analyses. Gene ontology analyses were  
426 performed using Database for Annotation, Visualization and Integrated Discovery (DAVID)  
427 Bioinformatics Resource<sup>62</sup> and genes with terms relevant to axon growth (FDR $<0.05$ ) based on literature  
428 review were user-selected for further analyses.

### 429 Enhancer Identification

430 Enhancers relevant to pro-growth genes were identified by running the Activity-by-contact (ABC)  
431 algorithm<sup>25</sup> using code described here - <https://github.com/broadinstitute/ABC-Enhancer-Gene-Prediction>.  
432 ENCODE datasets used for the analysis are - ATAC-Seq (ENCSR310MLB, ENCSR836PUC), H3K27Ac  
433 histone ChIP-seq (ENCSR094TTT, ENCSR428OEK), RNA-seq (ENCSR362AIZ, ENCSR080EVZ) and  
434 HiC (GSE96107). The algorithm has three sequential steps – definition of candidate enhancers,  
435 quantification of enhancer activity and calculation of ABC scores. For definition of candidate enhancers,  
436 indexed and sorted bam files of ATAC-Seq and H3K27Ac ChIP-seq datasets were supplied and peaks  
437 were called using MACS2, with the argument `--nStrongestPeaks 15000`. For quantification of enhancer  
438 activity, reads counts were calculated using peak files processed in the previous step to yield a final list of  
439 candidate enhancer regions with ATAC-seq and H3K27ac ChIP-seq read counts within gene bodies and

440 promoters. Finally, ABC scores were calculated using arguments `--hic_resolution 5000, -`  
441 `scale_hic_using_powerlaw` and a threshold of 0.01. The default threshold of 0.01 corresponds to  
442 approximately 70% recall and 60% precision. All enhancer-gene pairs that passed the above threshold  
443 were used for subsequent analyses.

#### 444 Co-occupancy motif analyses

445 Transcription factor binding site/motif analysis on pro-growth gene promoters and enhancers was  
446 performed using `opossum v3.0` software<sup>27</sup>. For promoter analyses, the list of pro-growth genes was  
447 supplied along with promoter co-ordinates to be used for scanning (upstream/downstream of TSS –  
448 1000/300 bps). For enhancer motif analyses, a unified file containing a list of FASTA formatted sequences  
449 corresponding to pro-growth enhancer regions was supplied.

450 Mouse anchored TF- cluster analyses were performed using search parameters – JASPAR CORE profiles  
451 that scan all vertebrate profiles with a minimum specificity of 8 bits, conservation cut-off of 0.40, matrix  
452 score threshold of 90%, and results sorted by Z-score  $\geq 10$ . TFs were sorted into three categories – TFs  
453 with over-represented sites within pro-growth promoters, TFs with over-represented sites within pro-  
454 growth enhancers and TFs with over-represented binding sites within both pro-growth promoters and  
455 enhancers.

#### 456 Network analyses

457  
458  
459 Hit TF-target gene networks were constructed using ENCODE ChIP-Seq data for hit TFs using the  
460 Harmonizome database<sup>63</sup>. For each of the 12 hit TFs, TF target gene lists were retrieved from  
461 Harmonizome individually and merged before visualization on the Cytoscape platform (v3.7.1).  
462 Cytoscape plug-ins ClueGO and CluePedia were used for network visualization. iRegulon plug-in on the  
463 Cytoscape platform was used to expand the network one-level and bring in additional regulators. Next, we  
464 calculated connectivity scores to assign centrality using the Network Analyzer option within Cytoscape  
465 3.7.1. TFs were ranked in descending order of connectivity scores to assign centrality. Core TFs were  
466 those TFs that had the highest connectivity scores and were centrally located in the network, followed by  
467 TFs with decreasing connectivity scores that occupied peripheral positions in the network. Upstream  
468 regulator analysis on *Klf6* target genes was run on differentially expressed genes listed in<sup>7</sup> using motif  
469 analyses described above. Motif analyses were done in batches such that each batch had genes belonging  
470 to one functional sub-network to identify *Klf6* synergizers by functional category.

#### 471 Cloning and virus production:



472 Constructs for candidate genes were purchased from Dharmacon or Origene, and relevant accession  
473 numbers for all 62 candidate TFs are summarized in **Supplementary Table 2**. mScarlet was a gift from  
474 Dorus Gadella (RRID:Addgene\_85044), pAAV-CAG-tdTomato (codon diversified) was a gift from  
475 Edward Boyden (RRID:Addgene\_59462), and mNeonGreen sequences were synthesized by Genscript,  
476 based on the amino acid sequence of <sup>64</sup>. For viral production, genes were cloned into an AAV-CAG  
477 backbone (Addgene-Plasmid #59462) using standard PCR amplification, as described in <sup>12</sup>. Maxipreps  
478 were prepared by Qiagen Endo-free kits and fully sequenced, and AAV9-tdTomato (Addgene Plasmid  
479 #59462) and AAV2-Retro of all other constructs were produced at the University of North Carolina Viral  
480 Vector Core and brought to  $1 \times 10^{13}$  particles per ml in sterile saline prior to injection. Viruses were mixed  
481 at a 3:3:2 ratio of combinatorial test genes and tracer; viral treatments are detailed in **Supplementary**  
482 **Table 3**.

### 483 Cortical cell culture and analysis of neurite outgrowth

484 All animal procedures were approved by the Marquette University Institutional Animal Care and Use  
485 Committee. Cortical neurons were prepared from early postnatal (P5-P7) Sprague Dawley rat pups  
486 (Harlan), with each experimental replicate derived from a separate litter. Procedures for dissociation,  
487 transfection, immunohistochemistry, imaging, and neurite outgrowth analysis were performed as in<sup>7</sup>.  
488 Plasmid expressing nuclear localized EGFP, mixed with text plasmids at a 1:3 ratio, served to identify  
489 transfected cells. Each 24-well culture plate included three standard treatments: EBFP control, Klf6  
490 plasmid mixed in equal parts with mCherry control, and Klf6 mixed in equal parts with VP16-Stat3.  
491 Remaining wells contained Klf6 mixed with candidate TFs. All morphological values were normalized to  
492 within-plate EBFP control values, the Klf6-only treatment served to set the level of Klf6's individual  
493 effect, and the Klf6/VP16-stat3 combination confirmed sensitivity of the assay plate to TF synergy<sup>7</sup>. For  
494 all cell culture experiments, neurite length from a minimum of 150 cells per treatment was averaged, and  
495 each experiment was repeated a minimum of three times on separate days. These averaged values were the  
496 basis for ANOVA with Fisher's multiple comparisons. Neurite outgrowth values, number of cells analyzed  
497 for every screening experiment are summarized in **Supplementary Table 2**.

### 499 Viral delivery to cortical neurons and pyramidotomy injuries

500 *In vivo* experiments were performed in a double-blind fashion, with non-involved lab personnel  
501 maintaining blinding keys. Experiments used adult C57BL/6 mice, 8 to 10 weeks of age at the start of the  
502 experiment. The first pyramidotomy experiment used female mice, and the second pyramidotomy and  
503 spinal crush experiment used mixed sex at approximately equal numbers; sex had no significant effect on  
504 axon growth in either experiment ( $p > .05$ , 2-Way ANOVA). Animals were randomized prior to viral

505 treatment, with each surgical day including equal numbers from each group. Cortical neurons were  
506 transduced using intracerebral microinjection as described in<sup>7,8</sup>. Briefly, mice were anesthetized with  
507 ketamine/xylazine (100/10 mg/kg, IP), mounted in a stereotactic frame, and skull exposed and scraped  
508 away with a scalpel blade. 0.5  $\mu$ l of virus particles were delivered at two sites located 0 mm / 1.3 mm and  
509 0.5 mm / 1.3mm (anterior / lateral from Bregma) in pyramidotomy experiments, and -0.6 mm / 1.3 mm  
510 and -1.2 mm / 1.3mm (anterior/lateral from Bregma) in spinal crush experiments, at a depth of 0.55 mm,  
511 and at a rate of 0.05  $\mu$ l/min using a pulled glass micropipette connected to a 10  $\mu$ l Hamilton syringe driven  
512 by a programmable pump (Stoelting QSI), with one minute dwell time. For spinal injections, mice were  
513 mounted in a custom spine stabilizer and viral particles or Cholera Toxin Subunit B conjugated to Alexa  
514 Fluor 647 (CTB-647) in sterile 0.9% NaCl (C22841- Thermofisher, Waltham, MA, final concentration of  
515 2%) were injected to the spinal cord through a pulled glass micropipette fitted to a 10  $\mu$ l Hamilton syringe  
516 driven by a Stoelting QSI pump (catalog # 53311) (pumping rate:0.04  $\mu$ l/min) between C4 and C5  
517 vertebrae, 0.35 mm lateral to the midline, and to depths of 0.6 mm and 0.8 mm, 0.5  $\mu$ l at each depth.  
518 Unilateral pyramidotomy was performed as described in<sup>8,12</sup>. Briefly, a ventral midline incision was made  
519 to expose the occipital bone, the ventrocaudal part of which was removed using fine rongeurs. The dura  
520 was punctured, and the right pyramid cut completely using a micro feather scalpel. For spinal crush  
521 injuries, mice were anesthetized and mounted in a spine stabilization device, a laminectomy performed at  
522 T12 vertebrae / T10/11 spinal cord, and forceps of width 250  $\mu$ m used to crush the cord for ten seconds,  
523 then grip-reversed and repeated for another ten seconds.

### 524 RNAScope

525 RNAScope kits are commercially available from Advanced Cell Diagnostics (ACD). We utilized the  
526 Multiplex v2 system for all RNAScope experiments (Cat-323100,ACD). Mouse brains were snap-frozen  
527 on dry ice and cryosectioned (25 $\mu$ m). Slides were baked at 60°C for 40 mins followed by RNAScope  
528 procedures according to manufacturer's instructions. Briefly, hydrogen peroxide solution was applied to  
529 baked slices and incubated for 10 mins at RT. Next, slices were incubated in boiling antigen retrieval  
530 solution (<98 °C) for 5 mins. Following retrieval, slices were washed in Nuclease free water three times, 5  
531 mins per wash. Then, brain slices were dehydrated in 100% ethanol briefly followed by treatment with  
532 ProteaseIII for 20 mins at 40°C. Following protease incubation, slices were washed in Nuclease free water  
533 three times, 5 mins per wash and probes were applied and allowed to incubate for 2 hours at 40°C. The  
534 following probes were purchased off the catalog- RNAScope® Probe - Mm-Klf6 (Cat- 426901, ACD),  
535 RNAScope® Probe - Mm-Nkx3-2 (Cat- 526401, ACD),RNAScope® Probe - Mm-Rarb (Cat- 463101,  
536 ACD). We designed a custom probe for Nr5a2, targeting a region common to all variants(RNAScope®  
537

538 Probe - Mm-Nr5a2-O1-C2, Cat- 547841-C2, ACD). All all probes were detected with TSA plus  
539 fluorophore used at 1:750 dilution. Before mounting the slices, a brief 5 minute incubation with DAPI was  
540 performed to label the nuclei. All RNAScope experiments were carried out between 1-3 days post  
541 cryosectioning to ensure tissue integrity.

### 542 543 Immunohistochemistry

544 Adult animals were perfused with 4% paraformaldehyde (PFA) in 1X-PBS (15710-Electron Microscopy  
545 Sciences, Hatfield, PA), brains, and spinal cords removed, and post-fixed overnight in 4% PFA.  
546 Transverse sections of the spinal cord or cortex were embedded in 12% gelatin in 1X-PBS (G2500-Sigma  
547 Aldrich, St.Louis, MO) and cut via Vibratome to yield 100  $\mu$ m sections. Sections were incubated  
548 overnight with primary antibodies PKC $\gamma$  (SC C-19, Santa Cruz, Dallas, TX, 1:500, RRID: AB\_632234),  
549 GFAP (DAKO, Z0334 1:500, RRID:AB\_10013482), or Cd11b (Invitrogen 14-01120-82 1:500,  
550 RRID:AB\_2536484) rinsed and then incubated for two hours with appropriate Alexa Fluor-conjugated  
551 secondary antibodies (Thermofisher, Waltham, MA, 1:500.) For TUNEL staining (In Situ Cell Death Kit,  
552 Roche), fresh frozen transverse cryostat sections (30  $\mu$ m) were post-fixed in 4% PFA 15 minutes,  
553 incubated in ethanol/acetic acid for 10 minutes, 0.4% Triton for 30 minutes, and with probe mixture for 1  
554 hour<sup>8</sup>. Staurosporine control (1  $\mu$ l, 1 mM; Sigma) was cortically injected 2 days prior to sacrifice.  
555 Fluorescent images were acquired using Olympus IX81 or Zeiss 880LSM microscopes.

### 556 557 Quantification of axon growth

558 In pyramidotomy experiments, axon growth was quantified from four 100  $\mu$ m transverse sections of the  
559 spinal cord of each animal that spanned C2 to C6 spinal cord. Starting from a complete series of transverse  
560 sections, the rostral-most was selected from C2 as identified by the morphology of the ventral horns of the  
561 spinal cord, and the next three selected at 1.6mm intervals in the caudal direction. Each section was  
562 imaged on Nikon confocal microscope (Nikon AR1+) using a 20X Plan Apochromatic (MRD00205, NA  
563 0,75) objective, gathering 20  $\mu$ m of images at 5  $\mu$ m intervals and then creating a maximum intensity  
564 projection. On the resulting image, virtual lines of 10  $\mu$ m width were placed at 200, 400, and 600  $\mu$ m from  
565 the midline and intersection of tdTomato<sup>+</sup> axons with these lines were quantified. For normalization, 100  
566  $\mu$ m transverse sections of the medullary pyramids were prepared by vibratome sectioning and imaged on a  
567 Nikon confocal microscope (Nikon AR1+) using a 60X Apochromatic Oil DIC N2 (MRD71600, NA 1.4)  
568 objective. Seven virtual lines of 10  $\mu$ m width were distributed evenly across the medial/lateral axis of the  
569 medullary pyramid, the number of tdTomato<sup>+</sup> axons visible in each was determined, and the total number  
570 of axons extrapolated based on the area of the entire pyramid and the area of the sampled regions. Fiber

571 index was calculated as the average number of axons at each distance from the midline across the 4  
572 replicate spinal sections, divided by the calculated number of axons detected in the pyramid. Counting of  
573 digital images was performed by three blinded observers, with final values reflecting the average.  
574 Exclusion criteria for pyramidotomy experiments were animals with less than 80% decrease in PKC $\gamma$  in  
575 the affected CST. For spinal crush injuries, quantification and normalization of cross-midline sprouting  
576 was nearly identical to those for pyramidotomy, with the exception that quantification was performed in 4  
577 horizontal sections of spinal cord, with the sampling area set 400  $\mu$ m from the midline. To quantify axon  
578 branching, the following procedure was employed. First, in transverse sections of cervical spinal cord,  
579 tdTomato+ CST axons were identified in a sampling region between 200 and 600  $\mu$ m from the midline.  
580 Next, axon segments traced, with the requirement that sampled segments must remain in a single confocal  
581 imaging plane at 60X magnification for a minimum of 100  $\mu$ m traced length. Finally, using Z-stacks to  
582 definitively distinguish true branches from near-plane intersections, the number of branches was counted  
583 in each sampled segment. A minimum of 5mm of total length, from three separate spinal sections, were  
584 sampled for each animal.

#### 585 586 Fluorescence activated nuclei sorting (FANS)

587 Equal numbers of male and female mice were used in every experiment in concordance with NIH  
588 guidelines. Adult mice received retrograde injections of viral vectors for Ctrl treatment, Klf6 alone  
589 treatment, or combined Klf6+ Nr5a2 treatment. One week later, animals were challenged with  
590 pyramidotomy injuries, as described above. One week post-injury, animals were euthanized, and the motor  
591 cortices were dissected. Tissue was collected only from the hemisphere contralateral to the pyramidotomy  
592 injury, thus isolating spared neurons and not neurons that experienced direct axotomy. Dissected cortices  
593 were minced finely using razor blades and transferred to pre-chilled 15 ml Dounce homogenizer filled  
594 with 3 ml Nuclear release buffer (320mM Sucrose, 5mM CaCl<sub>2</sub>, 3mM MgCl<sub>2</sub>, 10mM Tris-HCL, 0.3%  
595 Igepal). Tissue was dounced 15X while on ice and filtered sequentially via a 50 $\mu$ m, 20 $\mu$ m filter, and used  
596 as input for flow cytometry. Dissociated nuclei were flow-sorted on a BD FACS Melody using an 80 $\mu$ m  
597 nozzle and a sequential gating strategy (Sort type: Purity). Specifically, nuclei were first gated by SSH-H  
598 vs FSC-H and SSC-A vs FSC-A to separate debris vs intact nuclei. Nuclei that passed these filters were  
599 then filtered by SSC-W vs SSC-H to eliminate potential doublets. Finally, nuclei were gated by levels of  
600 fluorescence marker such that only the brightest nuclei are collected to a goal of approximately 30,000  
601 events for RNA-Seq and 4000 events for single-nuclei RNA-Seq.

#### 602 603 RNA-Seq data generation and analysis

604 Following FANS, nuclei were sorted directly into Trizol, lysed, and RNA was extracted according to  
605 manufacturer's instructions. Only samples with a RIN score of 8 and above were used for library prep.  
606 Total RNA was used for library prep using Takara SMARTer stranded total RNA-Seq kit v2 according to  
607 the manufacturer's instructions. Samples were sequenced at the University of Wisconsin-Madison  
608 Genomics core to a depth of 25 million paired-end reads on an Illumina HiSeq platform, with two  
609 replicates per treatment. Raw FASTQ files were fed into ENCODE consortia RNA-Seq pipeline described  
610 here - <https://github.com/ENCODE-DCC/rna-seq-pipeline>. Read alignment was performed using STAR<sup>65</sup>  
611 and transcript quantification performed using Kallisto<sup>66</sup>. Transcript counts from Kallisto were used for  
612 performing differential gene expression (DEG) analyses using EdgeR<sup>36</sup>. Transcripts were considered  
613 significant if they met the statistical requirement of having a corrected p-value of <0.05, FDR <0.05.  
614 Differentially expressed genes were further filtered to only include transcripts with FPKM > 5 and  
615 log2Foldchange > 1. RNA-Seq datasets have been deposited with NCBI GEO (SRP151916). Network  
616 analysis on significantly differentially expressed genes (upregulated) was performed on the cytoscape  
617 platform v3.7.1 using plug-ins clueGo and CluePedia. Functional analysis mode was selected and the  
618 following GO categories were selected for analyses- GO Biological Process, KEGG pathways, Reactome  
619 Pathways and Wiki pathways. Network specificity was set to medium and GO tree interval was set  
620 between 3-8. GO term kappa score was set to default values (0.4) and leading group term was set to rank  
621 by highest significance. Lastly, GO term fusion was also selected and only sub-networks with significantly  
622 enriched GO terms were used to generate network visualizations (p < 0.05, Right-sided hypergeometric  
623 test with Bonferroni correction, Cytoscape). Expression heat-maps were assembled using heatmapmer.ca  
624 using average linkage and Euclidean distance parameters for clustering.

### 625 626 Single nuclei RNA-Seq data generation and analysis

627 Equal numbers of male and female mice were used in every experiment in concordance with NIH  
628 guidelines. Adult mice (8 weeks) received retrograde injections of viral vectors for Ctrl treatment or  
629 combined Klf6+ Nr5a2 treatment. One week later, animals were challenged with pyramidotomy injuries,  
630 as described above. One-week post-injury, animals were euthanized, and the motor cortices were  
631 dissected. Dissected cortices were frozen on dry ice and stored at -80 degrees until library preparation.  
632 Frozen tissue was transferred to a pre-chilled 3 ml Kimble dounce homogenizer filled with 4ml Nuclei  
633 Lysis Buffer (Sigma, NUC101), supplemented with RNAase inhibitors (10mg/ml) (RNAase OUT,  
634 Thermofisher 10777019). Tissue was homogenized (20 strokes with pestle A and 25 stroked with pestle B)  
635 and allowed to incubate on ice for 5 mins. Following incubation, nuclei was centrifuged for 5 mins at 4  
636 degrees (800G, low brake and acceleration) and the pellet was resuspended in 4ml Nuclei lysis buffer.



637 Homogenate was incubated for 5 mins on ice. Following incubation, nuclei was centrifuged as described  
638 above and resuspended in 0.5ml 1X PBS with 1% BSA. Dissociated nuclei were filtered using a 20um  
639 filter and flow-sorted on a BD FACS Melody using an 80um nozzle to a goal of approximately 4500-5000  
640 events (gatey strategy described above). Nuclei were sorted directly into 10X RT buffer (enzyme added  
641 only prior to GEM generation) and library preparation was performed on the 10X chromium platform  
642 according to manufacturer's instructions (10x Genomics- Next GEM, Cat # PN1000121). Samples were  
643 sequenced at the University of Wisconsin-Madison Genomics core to a depth of ~ 70,000 reads/nuclei  
644 (3000-4000 nuclei per library) on an Illumina NovaSeq platform. Raw FASTQ files were fed into the  
645 Cellranger pipeline (default parameter) described here - <https://github.com/10XGenomics/cellranger>.  
646 Datasets were then integrated using SEURATv3<sup>39</sup> and differential expression testing was performed  
647 according to default conditions (non-parametric Wilcoxon rank sum test).

#### 648 Code availability:

649 There was no custom code development and all software used in data analyses are previously published,  
650 open-access and have been cited under the relevant methods section. Links to relevant software  
651 repositories/documentation is listed here -

652 WGCNA - <https://horvath.genetics.ucla.edu/html/CoexpressionNetwork/Rpackages/WGCNA/> ;

653 RNA-Seq analyses - <https://github.com/ENCODE-DCC/rna-seq-pipeline>;

654 EdgeR- <https://www.bioconductor.org/packages/release/bioc/html/edgeR.html>;

655 Activity-by-contact (ABC) - <https://github.com/broadinstitute/ABC-Enhancer-Gene-Prediction>;

656 oPOSSUM 3.0- <http://opossum.cisreg.ca/oPOSSUM3/> ;

657 Cytoscape - ClueGO - <http://www.ici.upmc.fr/cluego/cluegoDocumentation.shtml> ;

658 Harmonizome - <https://amp.pharm.mssm.edu/Harmonizome/>;

659 iRegulon - <http://iregulon.aertslab.org/>

660 Cellranger - <https://github.com/10XGenomics/cellranger>

661 SEURAT - <https://github.com/satijalab/seurat>

#### 662 Figure legends:

663 **Fig.1 | Integrated bioinformatics pipeline identifies Klf6 partner TFs likely involved in the**  
664 **regulation of axon growth** (a) Time-course gene expression datasets from mouse cortical neurons were  
665 integrated to isolate genes that are downregulated across cortical maturation *in vivo* and *in vitro* (b) Gene  
666 ontology analyses delineated developmentally downregulated genes that are likely growth relevant, based  
667 on functional enrichment in GO categories pertinent to axon growth (c) Activity-by-contact (ABC), an  
668 enhancer-target gene pairing algorithm, defined specific enhancer regions genome-wide that modulate the  
669



670 expression of growth relevant transcripts. Genome tracks are loaded to visualize the proximal and distal  
671 enhancer-promoter loops involved in the regulation of the pro-growth gene Sox11 during periods of  
672 developmental axon growth. ATAC-Seq profiles are shown in magenta and H3K27Ac profiles are shown  
673 in green. (d) TF co-occupancy analyses predicted TFs that co-occupy regulatory DNA alongside Klf6 to  
674 regulate the expression of growth-relevant transcripts.

675  
676 **Fig.2 | *In vitro* screening and network analyses identify a novel pro-growth transcription factor**

677 **network** (a) Postnatal cortical neurons were transfected with control plasmid, Klf6 with control, Klf6 with  
678 VP16-Stat3, or Klf6 combined with 62 candidate TFs. After two days in culture, automated image analysis  
679 (Cellomics) quantified neurite lengths normalized to the average of on-plate controls. The solid black line  
680 indicates the average control length. Combined expression of Klf6 and VP16-Stat3 showed expected  
681 increase in neurite length above Klf6 alone, confirming assay sensitivity (yellow bar, p-value <0.0001,  
682 ANOVA with post-hoc Fishers). 12 candidate TFs significantly enhanced neurite outgrowth when  
683 combined with Klf6 (orange bars, p-value <0.05, ANOVA with post-hoc Fishers), and 5 more enhanced  
684 growth in 2 of 3 replicates but missed the cut-off for statistical significance (blue bars). n>150 cells in each  
685 of three replicate experiments. (b) Representative images showing transfected neurons (white arrows,  
686 H2B-EGFP) and neurite tracing. (c) Network analysis was performed on transcripts upregulated by Klf6  
687 overexpression in culture neurons, followed by motif analysis of gene promoters within each module. Of  
688 the ten TF motifs with the highest enrichment, seven were hit TFs from the screening experiment (orange),  
689 including Rarb, Eomes, and Nr5a2. (d) Hit TFs were used to build networks. All hit TFs derived from  
690 candidates with predicted Klf6-cooccupancy in both promoters and enhancers. Rarb, Eomes, and Nr5a2  
691 were located in the network core, where Klf6 itself also appeared during network construction. Several  
692 soft hit TFs (blue) and established pro-growth TFs (pink) spontaneously populated outer shells. Scale bar  
693 is 100  $\mu$ m.

694  
695 **Fig.3 | Nr5a2 synergizes with Klf6 to promote CST growth. (a) Adult mice received cortical AAV**

696 **delivery of single or combinatorial TFs and contralateral pyramidotomy** (b) Co-injected tdTomato  
697 labeled CST axons, visible in cross section of the medullary pyramids. (c) PKCY immunohistochemistry  
698 confirmed unilateral ablation of the CST (arrow). (d,e) Cross-midline growth of CST axons was quantified  
699 in transverse sections of cervical spinal cord by counting intersections between labeled axons and virtual  
700 lines at 200 $\mu$ m, 400 $\mu$ m, 600 $\mu$ m from the midline, normalized to total labeled axons counted in the medulla  
701 (Fiber Index). Candidate TFs administered singly did not significantly elevate axon growth, whereas  
702 Nr5a2 and Rarb elevated growth above the level of Klf6 alone. (#p=.052, \* p<.05, \*\*p<.01, 2-way

ANOVA, post-hoc Dunnett's). (f-o) Representative images of cervical spinal cord showing elevated cross-midline growth in animals treated with Klf6 and Nr5a2. Scale bar is 500 $\mu$ m. n is between six and ten animals for all groups; PKCy, medulla, and spinal images from all animals are in Supplementary Figs. 2-5.

**Fig.4 | Nr5a2 synergizes with Rarb to promote CST growth** (a-d) Adult mice received cortical AAV delivery of single or combinatorial TFs and contralateral pyramidotomy. Co-injected AAV-tdTomato labeled CST axons. Elevated cross-midline sprouting of CST fiber is evident in animals treated with combined Nr5a2 and Rarb (arrows, d). (e) Cross-midline growth of CST axons was quantified in transverse spinal sections. Nr5a2 administered alone had no significant effect on axon growth (blue bars), but increased axon growth when combined with either Klf6 or Rarb, significantly above the level of either alone (green and pink bars, respectively). (\*\* $p < .01$ , 2-way ANOVA, post-hoc Dunnett's). Scale bar is 500  $\mu$ m. n is between 10 and 14 animals per group. PKCy, medulla, and spinal images from all animals are in Supplementary Figs. 2-5.

**Fig. 5 | Combined Klf6/Nr5a2 treatment increases the frequency of CST axon branching** (a,b) show CST axons transduced with control (a) or Klf6 and Nr5a2 (b) that have extended across the midline into contralateral cervical spinal cord. (c-f) at higher magnification, instances of branching can be identified (arrows). (g) Animals that received combined Klf6 and Nr5a2 showed a significant increase in the frequency of branch formation above control animals ( $p < .001$ , paired t-test). A minimum of 5mm of growth, from three separate sections, were quantified for each of 10 animals in both groups. Scale bars are 100  $\mu$ m (a,b) and 20  $\mu$ m (c-f).

**Fig. 6 | Combined expression of Klf6 and Nr5a2 in corticospinal neurons increases collateral sprouting but not extension through sites of spinal lesion** (a) Adult mice received cortical injection of AAV-EGFP tracer with AAV-Cre control or combined AAV-Klf6 and AAV-Nr5a2 and T10/11 spinal crush injuries. (b and c) show horizontal spinal sections with examples of CST axons (green), spinal injuries (arrowheads), and reactive astrocytes (GFAP, blue). Neither Cre control nor KLF6/Nr5a2-treated axons traverse the injury, but Klf6/Nr5a2-treated axons display cross-midline sprouting rostral to the injury (arrows). (d) shows CST collaterals crossing the midline (dotted line) and extending into contralateral cord. (e) Quantification of CST axons that extend 400 $\mu$ m from the midline, normalized to total CST axons counted in the medullary pyramids shows a significant elevation in cross-midline growth ( $p < .01$ , paired t-test,  $n = 5$  control, 5 Klf6/Nr5a2).

**Fig.7 | Combined Klf6, Nr5A2 treatment induces expression of gene modules involved in**

736 **macromolecule biosynthesis and DNA repair** (a) Overview of sample collection for RNA-Seq analysis.  
737 (b) Shows nuclei before and after FANS, confirming successful purification of mNeongreen+ nuclei. (c)  
738 Venn diagram showing transcript comparison across the three gene treatments (d) Regulatory network  
739 analysis of genes upregulated after Klf6 overexpression revealed sub-networks enriched for distinct  
740 functional categories highly relevant to axon growth. Nodes correspond to target genes and edges to  
741 multiple modes of interaction (physical, shared upstream regulators, shared signaling pathways and inter-  
742 regulation). Only significantly enriched GO categories were included in the network analysis ( $p < 0.05$ ,  
743 Right-sided hypergeometric test with Bonferroni correction, Cytoscape). (e) Heatmap showing selection of  
744 differentially expressed genes between control and Klf6 treatment. (f) shows the number of genes within  
745 each functional sub-network (top) and the total FPKM values in each in control and Klf6 overexpression  
746 groups. (g) Regulatory network analysis of genes uniquely upregulated after combined Klf6 and Nr5a2  
747 overexpression (not upregulated in single treatments) revealed sub-networks enriched for functions in  
748 macromolecule biosynthesis and DNA repair ( $p < 0.05$ , Right-sided hypergeometric test with Bonferroni  
749 correction, Cytoscape) (h) Heatmap showing selection of differentially expressed genes in DNA repair and  
750 macromolecule biosynthesis modules. Genes that are upregulated (green) and downregulated (red) relative  
751 to control are shown. Color values indicate average FPKM expression values as shown in legend. Columns  
752 correspond to treatment groups and rows to genes. (i) indicates the percent change in fpkm values within  
753 each module, revealing that combined KLF6 and Nr5a2 treatment most affect genes in DNA repair and  
754 Macromolecule biosynthesis modules (top). Graph shows the number of genes within functional sub-  
755 networks (bottom).  $n=3$  animals pooled per replicate, 2 reps/gene treatment.

756  
757 **Supplemental Fig. 1 | Expanded morphological screening data** (a) shows a transfected cortical neuron  
758 and tracing by cellomics, followed by schematic depictions of morphological parameters. (b-f) show the  
759 effect of forced expression of KLF6 alone, Klf6 with VP16-Stat3, or Klf6 with candidate TFs. In all cases  
760 measurements are normalized to those of within-plate control plasmids. Green bars indicate significant  
761 increases, and red bars indicate significant reductions compared to the values of klf6 alone ( $p < .05$ , 1-way  
762 ANOVA with post-hoc Fishers). A minimum of 150 individual cells from a minimum of three replicate  
763 experiments were used for each bar; full details are available in Supplementary Table 2.

764  
765 **Supplemental Fig. 2 | Co-injection of AAV2-Retro drives effective co-expression of transgenes in**  
766 **corticospinal tract neurons.** Adult mice received cortical injection of mixed AAV2-Retro-H2B-EGFP  
767 and AAV-H2B-mScarlet, followed two weeks later by injection of CTB-647 to cervical spinal cord.  
768 Animals were perfused three days later, and transverse sections of cortex examined by confocal

769 microscopy. (a-d) show the distribution of CST neurons and AAV-expressed fluorophores. (e-h) show  
770 higher magnification views, illustrating efficient co-expression of both fluorophores in CST neurons  
771 (arrows). The circle indicates a rare instance of a CST neuron expressing EGFP (green, F) but not  
772 mScarlet (red, G). (I) quantifies the percent of transduced CST neurons that show single expression of  
773 either fluorophore or dual expression of both: 95.4% ( $\pm$  1.51 SEM) of CST neurons were dually  
774 transfected. n=200 CST neurons scored from each of 5 mice. Scale bars are 1 mm (a-d) and 0.1mm (e-h).

775  
776 **Supplementary Fig. 3 | Summary of *in vivo* CST cross-midline growth after single or combinatorial**

777 **expression of candidate TFs** (a) illustrates the unilateral pyramidotomy injury and indicates the  
778 approximate location of images. (b) shows a transverse section of spinal cord, eight weeks after  
779 pyramidotomy, with CST axons labeled by tdTomato. Vertical lines show the sampling regions in which  
780 axonal profiles were counted at 200, 400, and 600um from the midline. (c,d) provide example images from  
781 all animals in the two *in vivo* experiments; where images are missing, the reason for exclusion is indicated.

782 **Supplementary Fig. 4 | Summary of tdTomato label in CST axons in the medulla, used to normalize**

783 **CST counts in the spinal cord** (a) illustrates the unilateral pyramidotomy injury and indicates the  
784 approximate location of images. (b) shows a transverse section of an example medullary pyramid, nine  
785 weeks after cortical injection with AAV-TF treatment and AAV-tdTomato tracer, in which CST axons  
786 appear as red (tdTomato+) puncta as they intersect the plane of the section. The pyramid is outlined, and  
787 vertical boxes indicate the regions in which each individual axon was counted. Total axon numbers were  
788 estimated by multiplying axon counts by the total sampling area, divided by total medullary area. (c,d)  
789 provide example images from all animals in two *in vivo* experiments; where images are missing, the  
790 reason for exclusion is indicated.

791  
792 **Supplementary Fig. 5 | Summary of PKC $\gamma$  signal in cervical spinal cord, used to verify unilateral**

793 **ablation of the CST** (a) illustrates the unilateral pyramidotomy injury and indicates the approximate  
794 location of images. (b) shows a transverse section of cervical spinal cord, eight weeks after pyramidotomy  
795 injury, with PKC $\gamma$  signal (green) readily detectable in the intact but not transected CST (white arrow).  
796 (c,d) provide example images of the dorsal columns after PKC $\gamma$  staining from all animals in two *in vivo*  
797 experiments; where images are missing, the reason for exclusion is indicated.

798  
799 **Supplementary Fig. 6 | RNAscope and immunohistochemistry confirm expression of candidate**

800 **transcription factors** (a-e) show coronal section of adult mouse cortex, eight weeks after cortical  
801 injection of AAV expressing candidate transcription factors, with arrows marking the site of injection.

802 RNAscope or appropriate antibodies were used to probe for expression. RNAscope signal from probes  
803 directed against the expressed TFs is present at the injection site, which at higher magnification (a'-d')  
804 shows the characteristic punctate detection of transcripts. e and e' show detection of Eomes by  
805 immunohistochemistry. (f-u) Adult mice received cortical injection of AAV-Klf6, AAV-Nr5a2, and AAV-  
806 tdTomato at 1.5:1.5:1 ratio, the same used in axon growth experiments. Two weeks later cortices were  
807 examined by fluorescent in situ hybridization (RNAscope) to visualize expression of Klf6 and Nr5a2. (f-h)  
808 show tdTomato at the site of viral injection, (i-k) show Klf6 expression, (l-n) show Nr5a2, and (o-q) show  
809 the overlay. Note that tissue distant from the injection site displays very low levels of Klf6 and Nr5a2  
810 detection, while virally-expressed transgenes are readily detected at the site of injection. (r-t) show a cortex  
811 that received AAV-tdTomato and AAV-Cre control (arrowhead), with low detection of endogenous Klf6  
812 (s) and Nr5a2 (t) transcripts. (u) tdTomato+ cells were classified according to dual, single, or no  
813 expression of Klf6 and Nr5a2 transcripts; more than 90% of tdTomato+ cells expressed both transcripts. n  
814 = 475 cells analyzed from three animals. Scale bars are 1mm (a-e, f, i, l, o, r-t), 50  $\mu$ m (a'-e'), and 100  $\mu$ m  
815 (g, h, j, k, m, n, p, q).

816  
817 **Supplemental Fig. 7 | Cortical injection of AAV-Klf6 and AAV-Nr5a2 does not elevate gliosis,**  
818 **inflammation, or cell death compared to injection of control AAV** (a-d) Adult mice received cortical  
819 injection of AAV-tdTomato with AAV-Cre or combined AAV-Klf6/AAV-Nr5a2 (KN). Three days later,  
820 animals were sacrificed and coronal sections of cortex examined for gliosis (GFAP), inflammation (Cd11b),  
821 or cell death (TUNEL). Both control and KN-injected animals showed similar levels of GFAP and cd11b  
822 near the site of injection (a, b) and minimal cell death (c,d). (e-h) Animals received cortical injection of  
823 AAV-Cre control or AAV-K/N and cervical injection of CTB-647 to label CST neurons. Four weeks after  
824 viral injection coronal sections of cortex were stained for GFAP, CD11B, or TUNEL reactivity. In both  
825 control and KN-treated animals CST neurons were apparent in the vicinity of the injection, and minimal  
826 levels of GFAP and CD11B persisted. (g,h) TUNEL signal was rare in both treatments, and never co-  
827 localized with CST neurons. (i) Shows adult cortex 2 days after injection of Staurosporine. Numerous cells  
828 are TUNEL-positive (green), confirming assay sensitivity. (j) quantifies the average number of TUNEL+  
829 cells located within 500 $\mu$ m of the injection track. Compared to staurosporine, AAV-Cre control and AAV-  
830 KLF6/Nr5a2 produce TUNEL+ cells at low numbers that do not statistically differ ( $p > .03$ , 1-way ANOVA  
831 with post-hoc Dunnett's). n=3 animals in each group, three replicate sections per animal. Scale bars are  
832 1mm (a-h) or 100  $\mu$ m (i).

833  
834 **Supplementary Fig. 8 | Single nuclei RNASeq analyses validate transcriptional changes following**

835 **combined KLF6/Nr5a2 gene treatment** (a) Overview of sample collection for Single nuclei RNA-Seq  
836 analysis. (b) UMAP visualization of 3383 nuclei (Control) and 3038 nuclei (KLF6+Nr5a2 treated) that  
837 passed QC filtering (see methods) confirms qualitative concordance across groups ( c) Expression of key  
838 marker genes delineated nuclei clusters specific to Corticospinal tract neurons (d) Bioinformatic analyses  
839 confirmed ~ 50% overlap in Klf6/Nr5a2 responsive target genes between the two independent RNA-Seq  
840 approaches. Regulatory network analysis of genes upregulated after combined Klf6/Nr5a2 overexpression  
841 confirmed sub-networks enriched for functional categories relevant to axon growth (e-g) Agreement of  
842 log2 Fold change in expression of functionally distinct Klf6/Nr5a2 responsive target genes between the  
843 two independent RNA-Seq approaches. Differential testing – Non-parametric Wilcoxon rank sum test  
844 (SEURAT v3). n=3 animals/rep and 2 reps/treatment.

## 849 **References**

- 850 1. Moore, D. L. & Goldberg, J. L. Multiple transcription factor families regulate axon growth  
851 and regeneration. *Dev. Neurobiol.* (2011) doi:10.1002/dneu.20934.
- 852 2. Venkatesh, I. & Blackmore, M. G. Selecting optimal combinations of transcription factors to  
853 promote axon regeneration: Why mechanisms matter. *Neurosci. Lett.* **652**, 64–73 (2017).
- 854 3. O'Donovan, K. J. Intrinsic Axonal Growth and the Drive for Regeneration. *Front. Neurosci.*  
855 **10**, 486 (2016).
- 856 4. Mahar, M. & Cavalli, V. Intrinsic mechanisms of neuronal axon regeneration. *Nat. Rev.*  
857 *Neurosci.* **19**, 323–337 (2018).
- 858 5. He, Z. & Jin, Y. Intrinsic Control of Axon Regeneration. *Neuron* **90**, 437–451 (2016).
- 859 6. Goldberg, J. L. How does an axon grow? *Genes Dev.* (2003).
- 860 7. Wang, Z. *et al.* KLF6 and STAT3 co-occupy regulatory DNA and functionally synergize to  
861 promote axon growth in CNS neurons. *Sci. Rep.* **8**, 12565 (2018).
- 862 8. Wang, Z., Reynolds, A., Kirry, A., Nienhaus, C. & Blackmore, M. G. Overexpression of  
863 Sox11 Promotes Corticospinal Tract Regeneration after Spinal Injury While Interfering with  
864 Functional Recovery. *Journal of Neuroscience* **35**, 3139–3145 (2015).



- 865 9. Norsworthy, M. W. *et al.* Sox11 Expression Promotes Regeneration of Some Retinal  
866 Ganglion Cell Types but Kills Others. *Neuron* **94**, 1112-1120.e4 (2017).
- 867 10. Luo, X. *et al.* Enhanced Transcriptional Activity and Mitochondrial Localization of STAT3  
868 Co-induce Axon Regrowth in the Adult Central Nervous System. *Cell Rep.* **15**, 398-410  
869 (2016).
- 870 11. Belin, S. *et al.* Injury-Induced Decline of Intrinsic Regenerative Ability Revealed by  
871 Quantitative Proteomics. *Neuron* **86**, 1000-1014 (2015).
- 872 12. Blackmore, M. G. *et al.* Kruppel-like Factor 7 engineered for transcriptional activation  
873 promotes axon regeneration in the adult corticospinal tract. *Proceedings of the National*  
874 *Academy of Sciences* **109**, 7517-7522 (2012).
- 875 13. Palmisano, I. *et al.* Epigenomic signatures underpin the axonal regenerative ability of  
876 dorsal root ganglia sensory neurons. *Nat. Neurosci.* **22**, 1913-1924 (2019).
- 877 14. Li, S. *et al.* The transcriptional landscape of dorsal root ganglia after sciatic nerve  
878 transection. *Sci. Rep.* **5**, 16888 (2015).
- 879 15. Dhara, S. P. *et al.* Cellular reprogramming for successful CNS axon regeneration is driven  
880 by a temporally changing cast of transcription factors. *Sci. Rep.* **9**, 14198 (2019).
- 881 16. Hilton, B. J. & Bradke, F. Can injured adult CNS axons regenerate by recapitulating  
882 development? *Development* **144**, 3417-3429 (2017).
- 883 17. Kidder, B. L., Yang, J. & Palmer, S. Stat3 and c-Myc genome-wide promoter occupancy in  
884 embryonic stem cells. *PLoS One* **3**, (2008).
- 885 18. He, A., Kong, S. W., Ma, Q. & Pu, W. T. Co-occupancy by multiple cardiac transcription  
886 factors identifies transcriptional enhancers active in heart. *Proceedings of the National*  
887 *Academy of Sciences* **108**, 5632-5637 (2011).
- 888 19. Liu, L. *et al.* Modeling co-occupancy of transcription factors using chromatin features.  
889 *Nucleic Acids Res.* **44**, e49-e49 (2015).
- 890 20. Lee, Y. & Zhou, Q. Co-regulation in embryonic stem cells via context-dependent binding of  
891 transcription factors. *Bioinformatics* **29**, 2162-2168 (2013).

- 892 21. Wang, J. *et al.* Factorbook.org: a Wiki-based database for transcription factor-binding data  
893 generated by the ENCODE consortium. *Nucleic Acids Res.* **41**, D171–D176 (2013).
- 894 22. Wang, J. *et al.* Sequence features and chromatin structure around the genomic regions  
895 bound by 119 human transcription factors. *Genome Res.* **22**, 1798–1812 (2012).
- 896 23. Arlotta, P. *et al.* Neuronal Subtype-Specific Genes that Control Corticospinal Motor Neuron  
897 Development In Vivo. *Neuron* **45**, 207–221 (2005).
- 898 24. Venkatesh, I., Mehra, V., Wang, Z., Califf, B. & Blackmore, M. G. Developmental Chromatin  
899 Restriction of Pro-Growth Gene Networks Acts as an Epigenetic Barrier to Axon  
900 Regeneration in Cortical Neurons. *Dev. Neurobiol.* **78**, 960–977 (2018).
- 901 25. Fulco, C. P. *et al.* Activity-by-contact model of enhancer-promoter regulation from  
902 thousands of CRISPR perturbations. *Nat. Genet.* **51**, 1664–1669 (2019).
- 903 26. Gerstein, M. B. *et al.* Architecture of the human regulatory network derived from ENCODE  
904 data. *Nature* **489**, 91–100 (2012).
- 905 27. Kwon, A. T., Arenillas, D. J., Hunt, R. W. & Wasserman, W. W. oPOSSUM-3: Advanced  
906 Analysis of Regulatory Motif Over-Representation Across Genes or ChIP-Seq Datasets. *G3:  
907 Genes/Genomes/Genetics* **2**, 987–1002 (2012).
- 908 28. Moore, D. L. *et al.* KLF family members regulate intrinsic axon regeneration ability.  
909 *Science* **326**, 298–301 (2009).
- 910 29. Callif, B. L., Maunze, B., Krueger, N. L., Simpson, M. T. & Blackmore, M. G. The application  
911 of CRISPR technology to high content screening in primary neurons. *Mol. Cell. Neurosci.*  
912 (2017) doi:10.1016/j.mcn.2017.01.003.
- 913 30. Simpson, M. T. *et al.* The tumor suppressor HHEX inhibits axon growth when prematurely  
914 expressed in developing central nervous system neurons. *Mol. Cell. Neurosci.* **68**, (2015).
- 915 31. Blackmore, M. G. *et al.* High content screening of cortical neurons identifies novel  
916 regulators of axon growth. *Mol. Cell. Neurosci.* **44**, 43–54 (2010).
- 917 32. Fagoe, N. D., Attwell, C. L., Kouwenhoven, D., Verhaagen, J. & Mason, M. R. J.  
918 Overexpression of ATF3 or the combination of ATF3, c-Jun, STAT3 and Smad1 promotes

- 919 regeneration of the central axon branch of sensory neurons but without synergistic  
920 effects. *Hum. Mol. Genet.* **24**, 6788–6800 (2015).
- 921 33. Lerch, J. K., Martínez-Ondaro, Y. R., Bixby, J. L. & Lemmon, V. P. cJun promotes CNS axon  
922 growth. *Mol. Cell. Neurosci.* **59**, 97–105 (2014).
- 923 34. Mehta, S. T., Luo, X., Park, K. K., Bixby, J. L. & Lemmon, V. P. Hyperactivated Stat3 boosts  
924 axon regeneration in the CNS. *Exp. Neurol.* **280**, 115–120 (2016).
- 925 35. Wang, Z., Maunze, B., Wang, Y., Tsoulfas, P. & Blackmore, M. G. Global Connectivity and  
926 Function of Descending Spinal Input Revealed by 3D Microscopy and Retrograde  
927 Transduction. *J. Neurosci.* **38**, 10566–10581 (2018).
- 928 36. Robinson, M. D., McCarthy, D. J. & Smyth, G. K. edgeR: a Bioconductor package for  
929 differential expression analysis of digital gene expression data. *Bioinformatics* **26**, 139–  
930 140 (2010).
- 931 37. Fink, K. L., López-Giráldez, F., Kim, I.-J., Strittmatter, S. M. & Cafferty, W. B. J. Identification  
932 of Intrinsic Axon Growth Modulators for Intact CNS Neurons after Injury. *Cell Rep.* **18**,  
933 2687–2701 (2017).
- 934 38. Economo, M. N. *et al.* Distinct descending motor cortex pathways and their roles in  
935 movement. *Nature* **563**, 79–84 (2018).
- 936 39. Butler, A., Hoffman, P., Smibert, P., Papalexi, E. & Satija, R. Integrating single-cell  
937 transcriptomic data across different conditions, technologies, and species. *Nat. Biotechnol.*  
938 **36**, 411–420 (2018).
- 939 40. Wang, Z., Winsor, K., Nienhaus, C., Hess, E. & Blackmore, M. G. Combined chondroitinase  
940 and KLF7 expression reduce net retraction of sensory and CST axons from sites of spinal  
941 injury. *Neurobiol. Dis.* **99**, 24–35 (2017).
- 942 41. Robinson-Rechavi, M., Escriva Garcia, H. & Laudet, V. The nuclear receptor superfamily. *J.*  
943 *Cell Sci.* **116**, 585–586 (2003).

- 944 42. Yip, P. K. *et al.* Lentiviral vector expressing retinoic acid receptor  $\beta$ 2 promotes recovery of  
945 function after corticospinal tract injury in the adult rat spinal cord. *Hum. Mol. Genet.* **15**,  
946 3107–3118 (2006).
- 947 43. Hale, M. A. *et al.* The nuclear hormone receptor family member NR5A2 controls aspects of  
948 multipotent progenitor cell formation and acinar differentiation during pancreatic  
949 organogenesis. *Development* **141**, 3123–3133 (2014).
- 950 44. Stergiopoulos, A. & Politis, P. K. Nuclear receptor NR5A2 controls neural stem cell fate  
951 decisions during development. *Nat. Commun.* **7**, 12230 (2016).
- 952 45. Liu, Y. *et al.* A Sensitized IGF1 Treatment Restores Corticospinal Axon-Dependent  
953 Functions. *Neuron* **95**, 817-833.e4 (2017).
- 954 46. Chandran, V. *et al.* A Systems-Level Analysis of the Peripheral Nerve Intrinsic Axonal  
955 Growth Program. *Neuron* **89**, 956–970 (2016).
- 956 47. Puttagunta, R. *et al.* PCAF-dependent epigenetic changes promote axonal regeneration in  
957 the central nervous system. *Nat. Commun.* **5**, 3527 (2014).
- 958 48. Du, K. *et al.* Pten Deletion Promotes Regrowth of Corticospinal Tract Axons 1 Year after  
959 Spinal Cord Injury. *Journal of Neuroscience* **35**, 9754–9763 (2015).
- 960 49. Leibinger, M. *et al.* Transneuronal delivery of hyper-interleukin-6 enables functional  
961 recovery after severe spinal cord injury in mice. *Nat. Commun.* **12**, 391 (2021).
- 962 50. Kadoya, K. *et al.* Spinal cord reconstitution with homologous neural grafts enables robust  
963 corticospinal regeneration. *Nat. Med.* **22**, 479–487 (2016).
- 964 51. Tuszynski, M. H. & Steward, O. Concepts and methods for the study of axonal  
965 regeneration in the CNS. *Neuron* **74**, 777–791 (2012).
- 966 52. Chen, M. & Zheng, B. Axon plasticity in the mammalian central nervous system after  
967 injury. *Trends Neurosci.* **37**, 583–593 (2014).
- 968 53. Ewan, E. E., Carlin, D., Goncalves, T. M., Zhao, G. & Cavalli, V. Ascending dorsal column  
969 sensory neurons respond to spinal cord injury and downregulate genes related to lipid  
970 metabolism. doi:10.1101/2020.05.07.083584.

- 971 54. Haffner, M. C., De Marzo, A. M., Meeker, A. K., Nelson, W. G. & Yegnasubramanian, S.  
972 Transcription-induced DNA double strand breaks: both oncogenic force and potential  
973 therapeutic target? *Clin. Cancer Res.* **17**, 3858–3864 (2011).
- 974 55. Sebastian, R. & Oberdoerffer, P. Transcription-associated events affecting genomic  
975 integrity. *Philos. Trans. R. Soc. Lond. B Biol. Sci.* **372**, (2017).
- 976 56. Onishi, K. *et al.* Genome Stability by DNA Polymerase  $\beta$  in Neural Progenitors Contributes  
977 to Neuronal Differentiation in Cortical Development. *J. Neurosci.* **37**, 8444–8458 (2017).
- 978 57. Baleriola, J. *et al.* Increased neuronal death and disturbed axonal growth in the Pol $\mu$ -  
979 deficient mouse embryonic retina. *Sci. Rep.* **6**, 25928 (2016).
- 980 58. Krishnan, A. *et al.* A BRCA1-Dependent DNA Damage Response in the Regenerating Adult  
981 Peripheral Nerve Milieu. *Mol. Neurobiol.* **55**, 4051–4067 (2018).
- 982 59. Kim, D., Langmead, B. & Salzberg, S. L. HISAT: a fast spliced aligner with low memory  
983 requirements. *Nat. Methods* **12**, 357–360 (2015).
- 984 60. Pertea, M., Kim, D., Pertea, G. M., Leek, J. T. & Salzberg, S. L. Transcript-level expression  
985 analysis of RNA-seq experiments with HISAT, StringTie and Ballgown. *Nat. Protoc.* **11**,  
986 1650–1667 (2016).
- 987 61. Langfelder, P. & Horvath, S. WGCNA: an R package for weighted correlation network  
988 analysis. *BMC Bioinformatics* **9**, 559 (2008).
- 989 62. Huang, D. W., Sherman, B. T. & Lempicki, R. A. Systematic and integrative analysis of  
990 large gene lists using DAVID bioinformatics resources. *Nat. Protoc.* **4**, 44–57 (2009).
- 991 63. Rouillard, A. D. *et al.* The harmonizome: a collection of processed datasets gathered to  
992 serve and mine knowledge about genes and proteins. *Database* **2016**, (2016).
- 993 64. Shaner, N. C. *et al.* A bright monomeric green fluorescent protein derived from  
994 *Branchiostoma lanceolatum*. *Nat. Methods* **10**, 407–409 (2013).
- 995 65. Dobin, A. *et al.* STAR: ultrafast universal RNA-seq aligner. *Bioinformatics* **29**, 15–21 (2013).
- 996 66. Bray, N. L., Pimentel, H., Melsted, P. & Pachter, L. Near-optimal probabilistic RNA-seq  
997 quantification. *Nat. Biotechnol.* **34**, 525–527 (2016).

**a****Assembly of developmentally downregulated genes**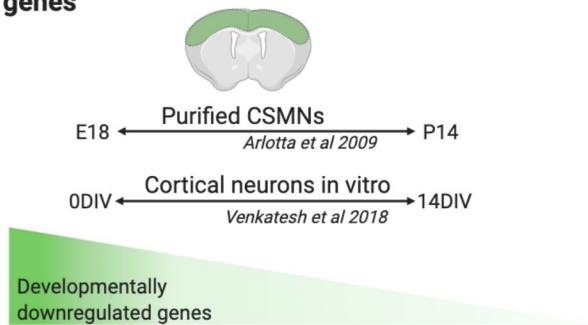**b****Filtering to pro-growth genes**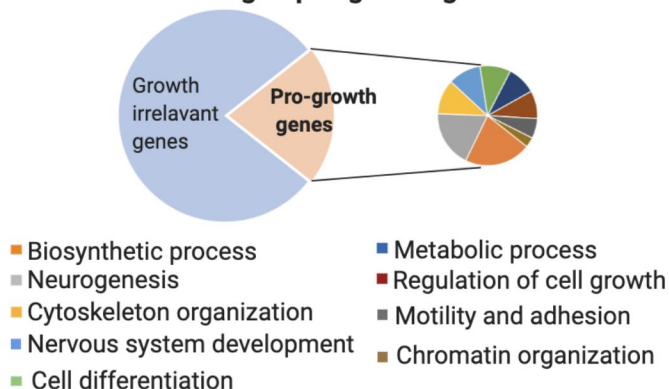**c****Identification of pro-growth enhancers**

Embryonic mouse whole cortex datasets

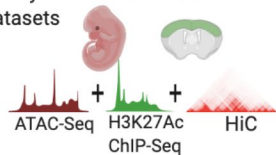

Activity-by-contact algorithm

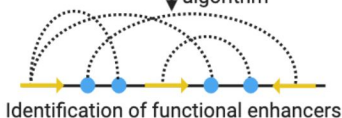

Visualization of Sox11 promoter-enhancer loops present during periods of developmental axon growth

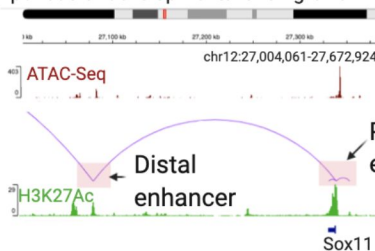**d****TF co-occupancy analyses**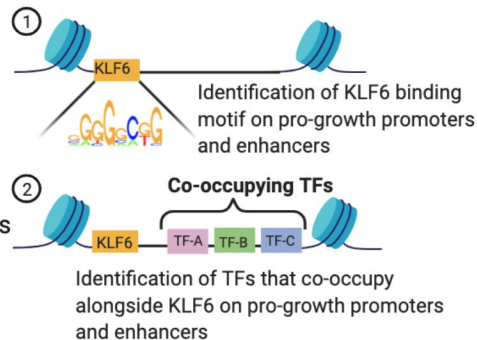



**a**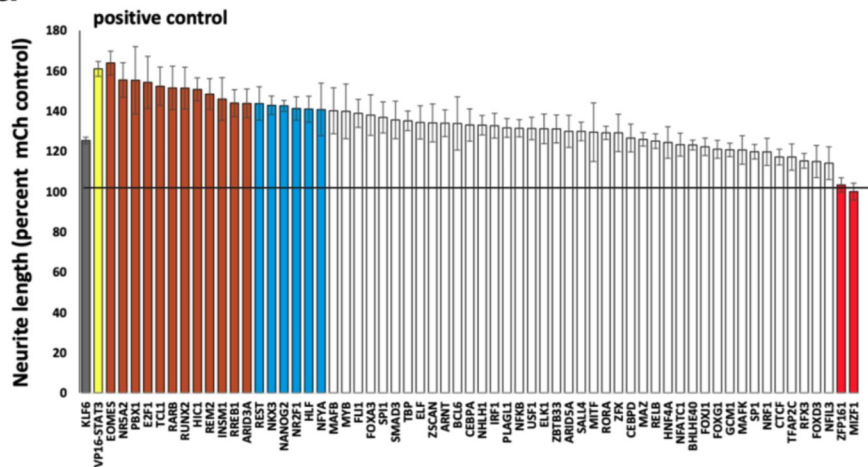**b**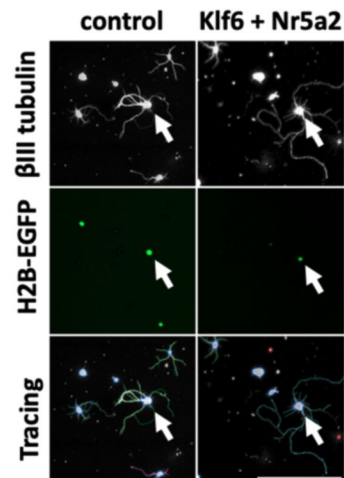**c**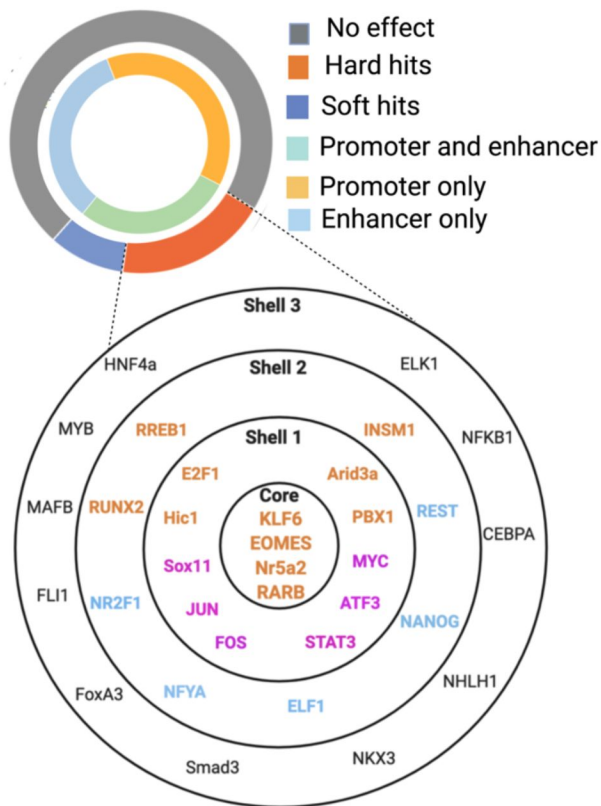**d**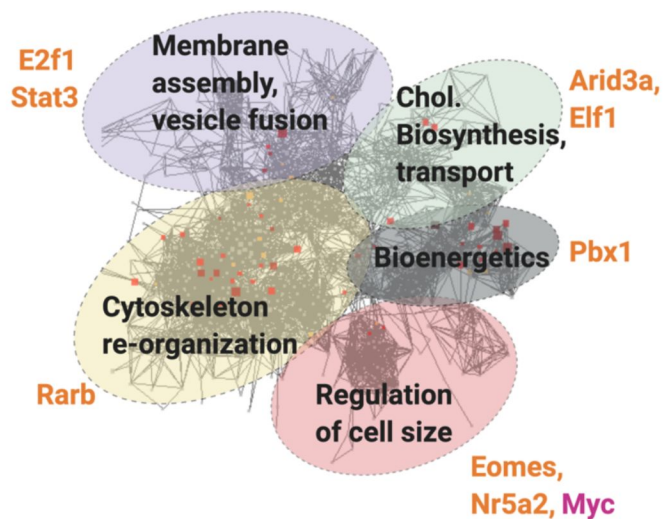

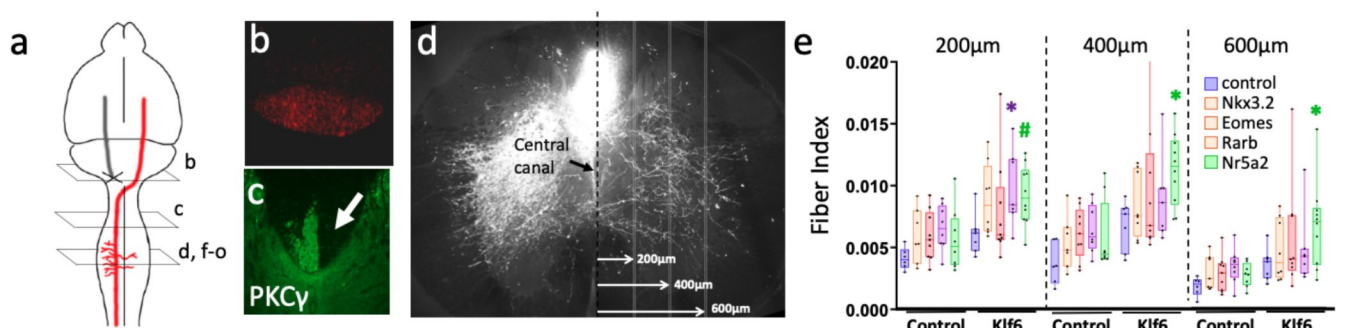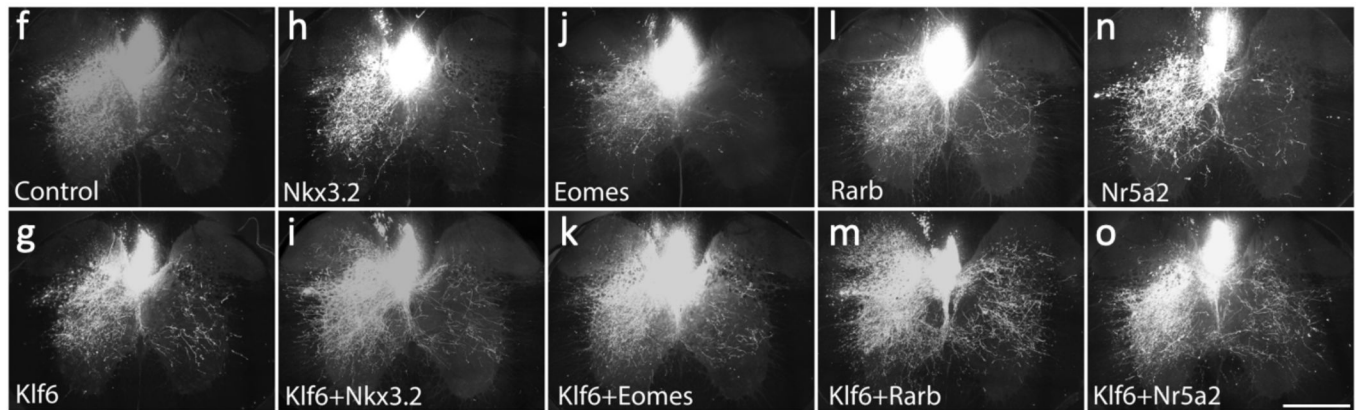

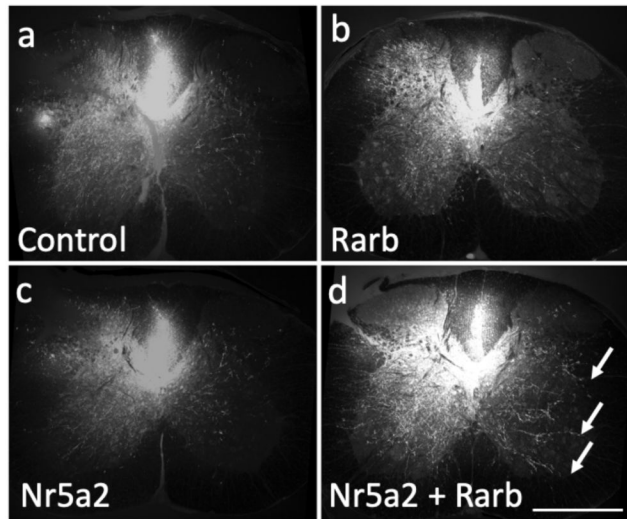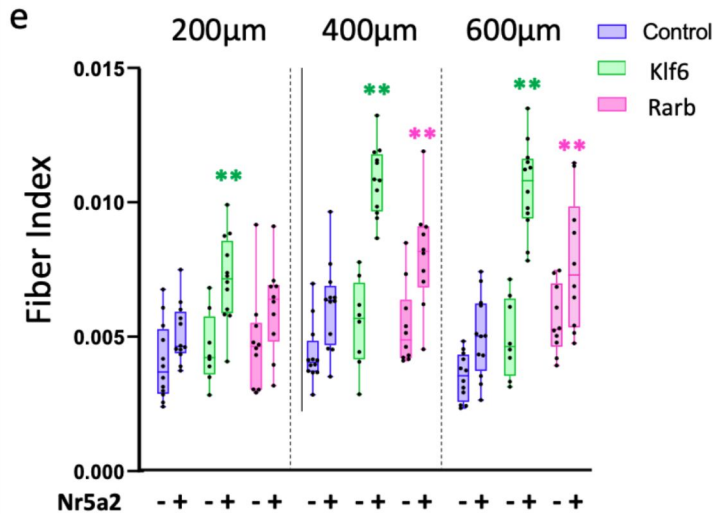

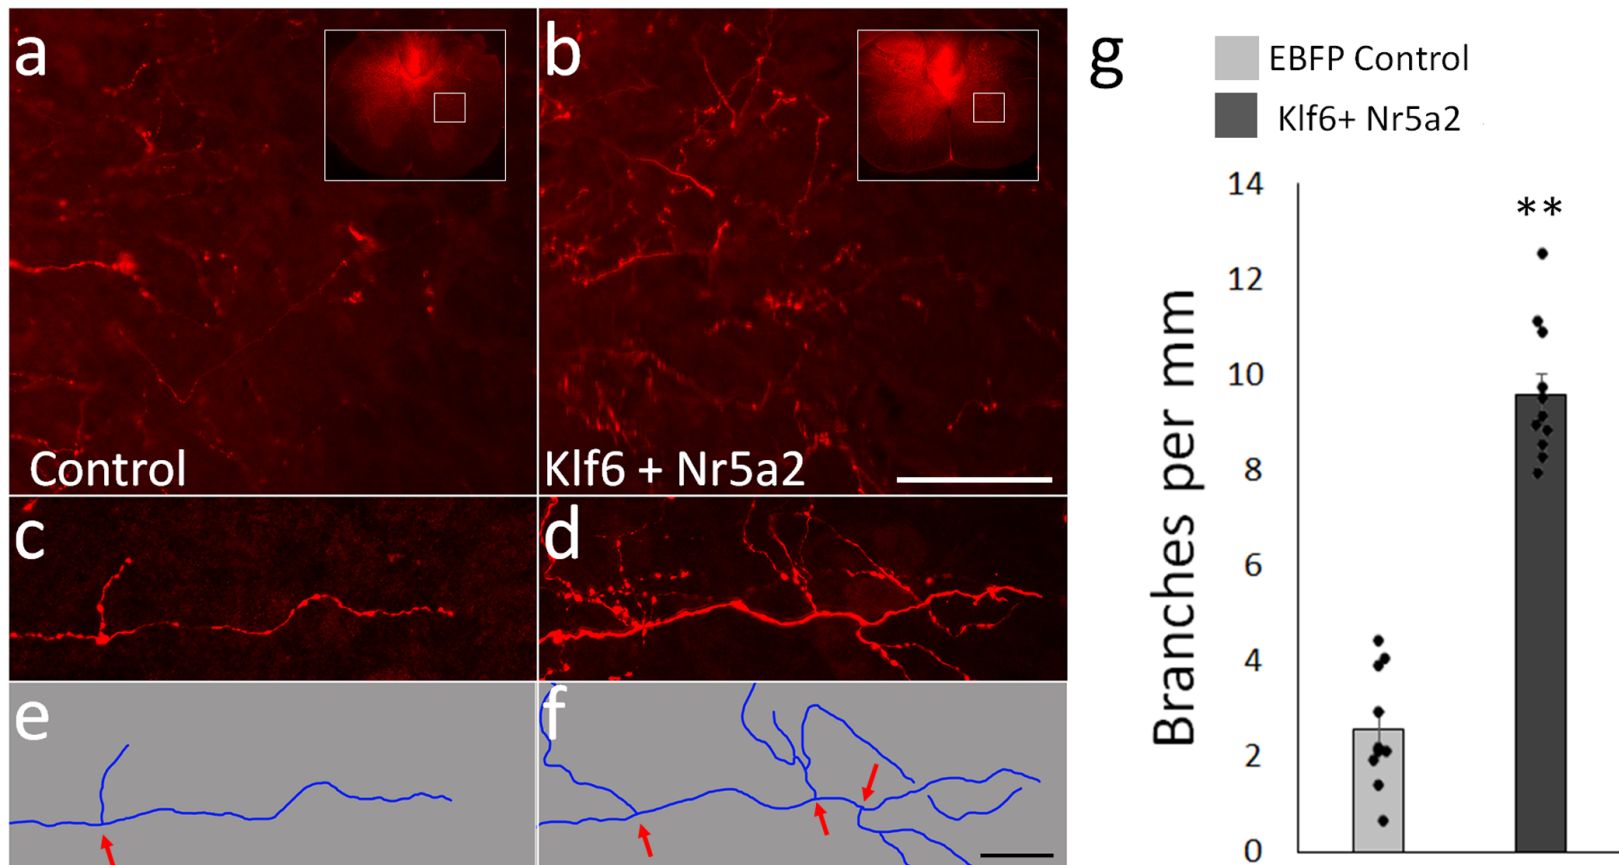



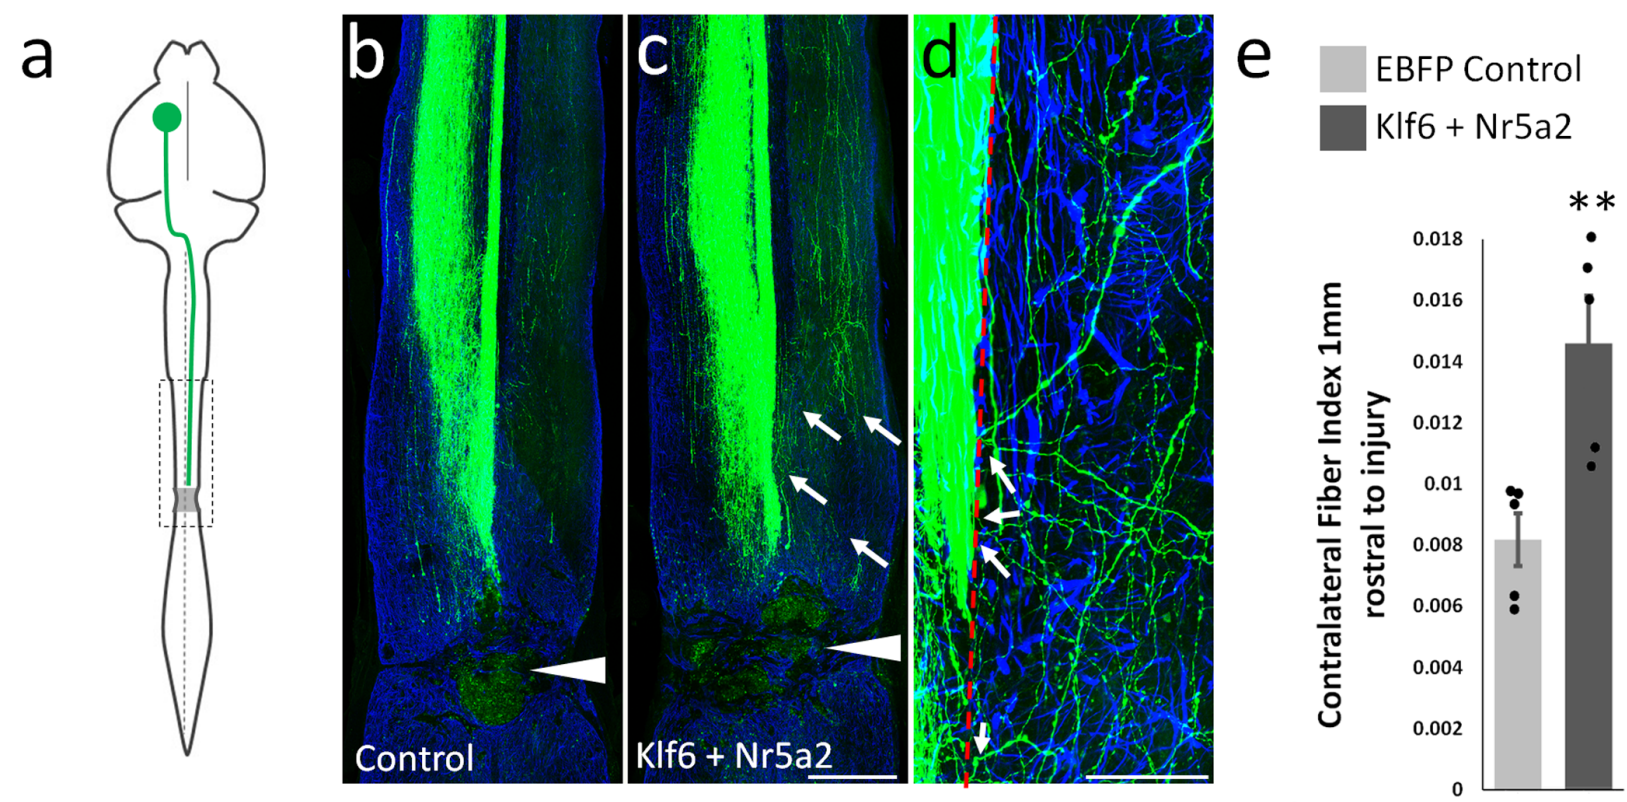

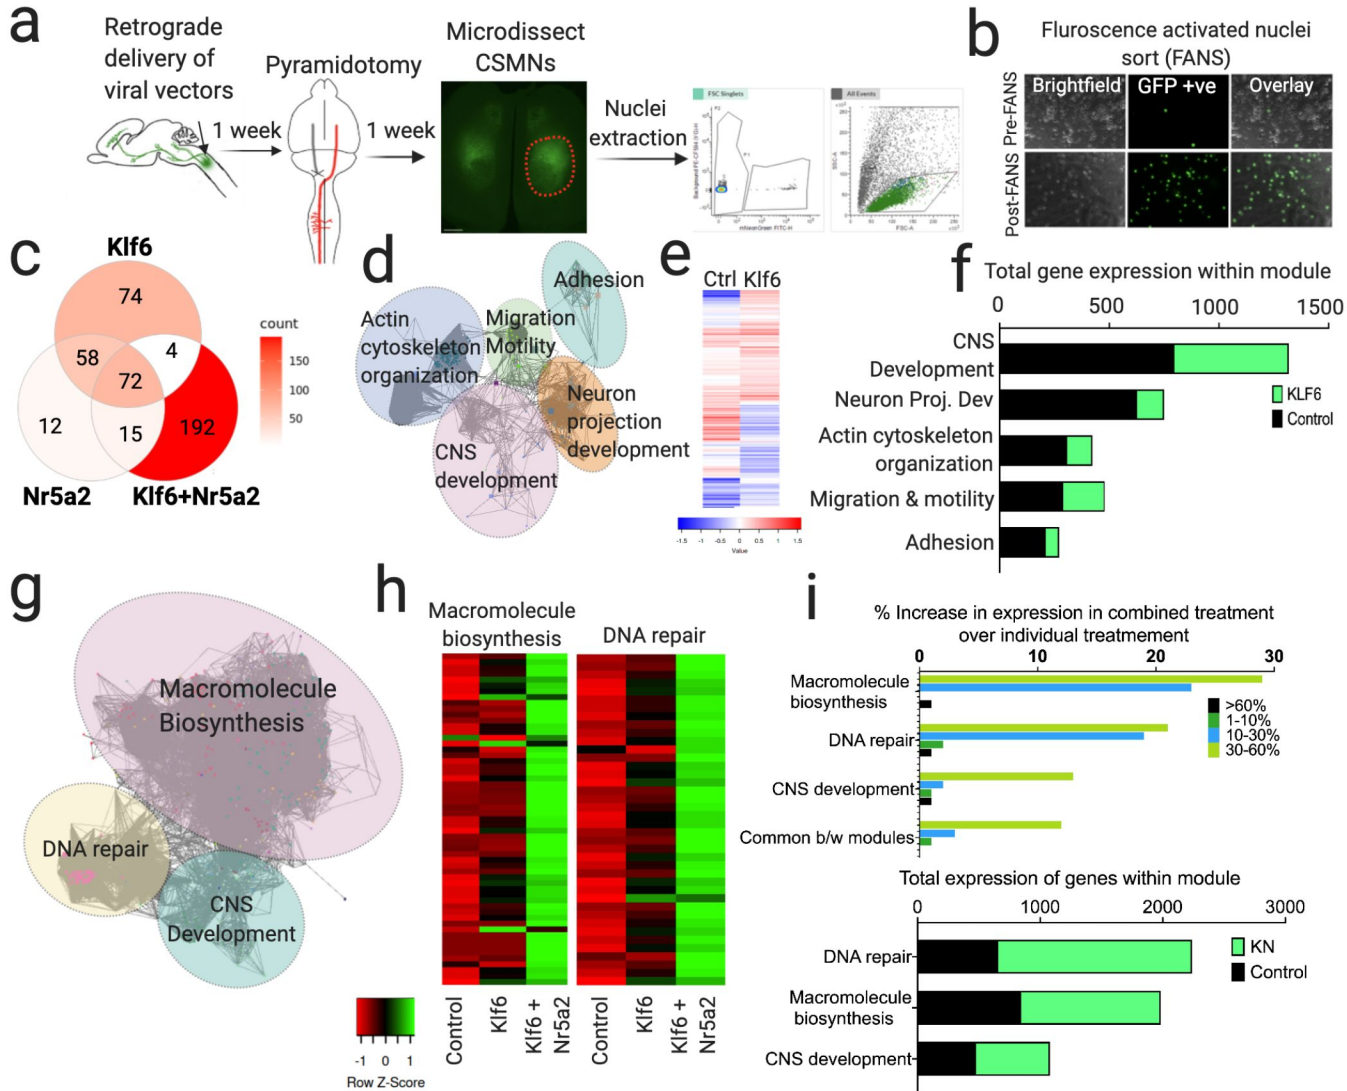

Source: https://www.biorxiv.org/content/10.1101/2020.06.12.146159v2.full.pdf
